# Supplementary material for: LncRNA-Safe contributes to cardiac fibrosis through Safe-Sfrp2-HuR complex in mouse myocardial infarction
Source: PubMed Central journal article supplement (PMC6831303; doi:10.7150/thno.33920), 2019-09-25
Supplement: thnov09p7282s1.pdf [file thnov09p7282s1.pdf]

## SUPPLEMENTAL INFORMATION

### **LncRNA-*Safe* contributes to cardiac fibrosis through *Safe-Sfrp2*-HuR complex in mouse myocardial infarction**

Kaili Hao<sup>1,#</sup>, Wei Lei<sup>1,#</sup>, Hongchun Wu<sup>1</sup>, Jie Wu<sup>1</sup>, Zhuangzhuang Yang<sup>1</sup>, Shiping Yan<sup>1</sup>, Xing-Ai Lu<sup>1</sup>, Jingjing Li<sup>1</sup>, Xue Xia<sup>1</sup>, Xinglong Han<sup>1</sup>, Wenbo Deng<sup>2</sup>, Guisheng Zhong<sup>3</sup>, Zhen-Ao Zhao<sup>1</sup>, Shijun Hu<sup>1,\*</sup>

<sup>1</sup>Department of Cardiovascular Surgery of the First Affiliated Hospital & Institute for Cardiovascular Science, State Key Laboratory of Radiation Medicine and Protection, Medical College, Soochow University, Suzhou 215000, China; <sup>2</sup>Fujian Provincial Key Laboratory of Reproductive Health Research, School of Medicine, Xiamen University, Xiamen 361102, China; <sup>3</sup>iHuman Institute, School of Life Science and Technology, ShanghaiTech University, Shanghai 210021, China.

# Co-first authors

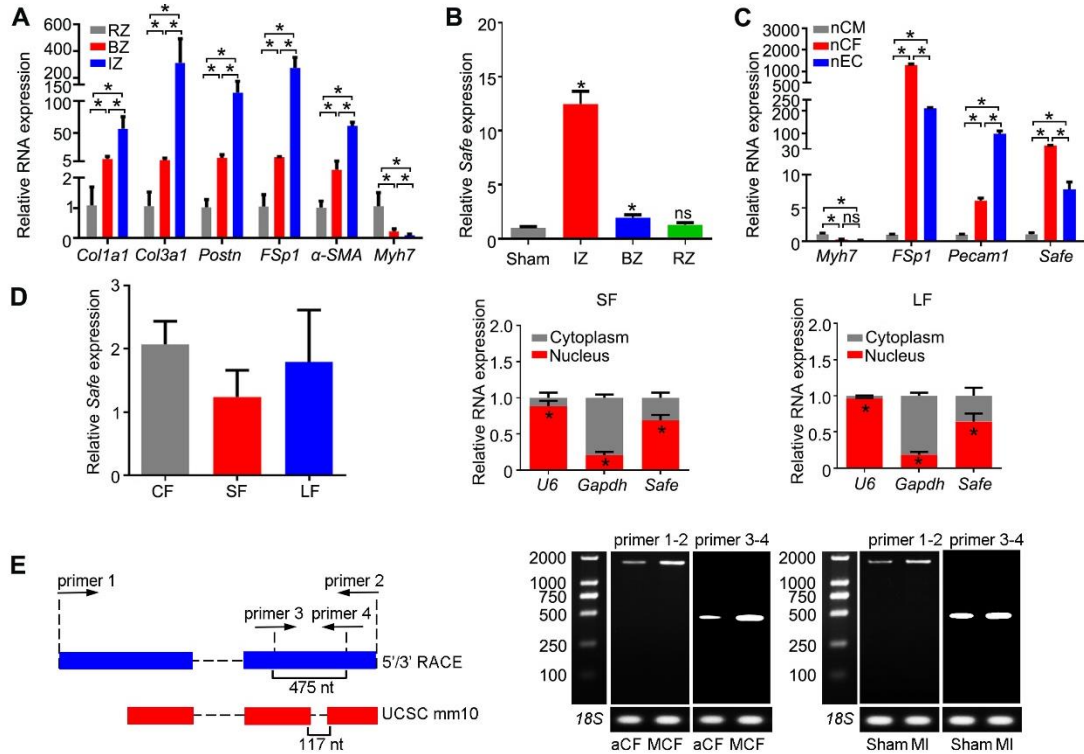

**Figure S1 *Safe* distribution in the nucleus of fibroblasts.** (A) qRT-PCR detection of *Colla1*, *Col3a1*, *Postn*, *FSp1*, *α-SMA* and *Mhy7* in infarct zone (IZ), border zone (BZ) and remote zone (RZ) of MI hearts at day 14 post MI (n=3). (B) qRT-PCR detection of *Safe* expression in IZ, BZ and RZ of MI hearts at day 14 post MI (n=3). (C) qRT-PCR detection of *Safe* expression in cardiomyocytes (nCM), cardiac fibroblasts (nCF) and endothelial cells (nEC) from neonatal mouse hearts (n=3). (D) qRT-PCR detection of *Safe* expression and subcellular localization in cardiac fibroblasts (CF), skin fibroblasts (SF) and lung fibroblasts (LF) (n=3). (E) Schematic diagram of identifying whether there were different variants of *Safe*. Primer 1-2 (1 bp-1517 bp) were used to identify the full length determined by RACE, primer 3-4 (938 bp-1412 bp) was used to identify the different variants. Right: Agarose gel electrophoresis of the PCR products amplified from cardiac fibroblasts (CF) and myofibroblasts (MF), as well as in sham-operation (Sham) and myocardial infarction (MI) cardiac samples. All data are presented as mean ± SEM; Student's *t*-test or one-way ANOVA; \**p* < 0.05, and ns, not significant.

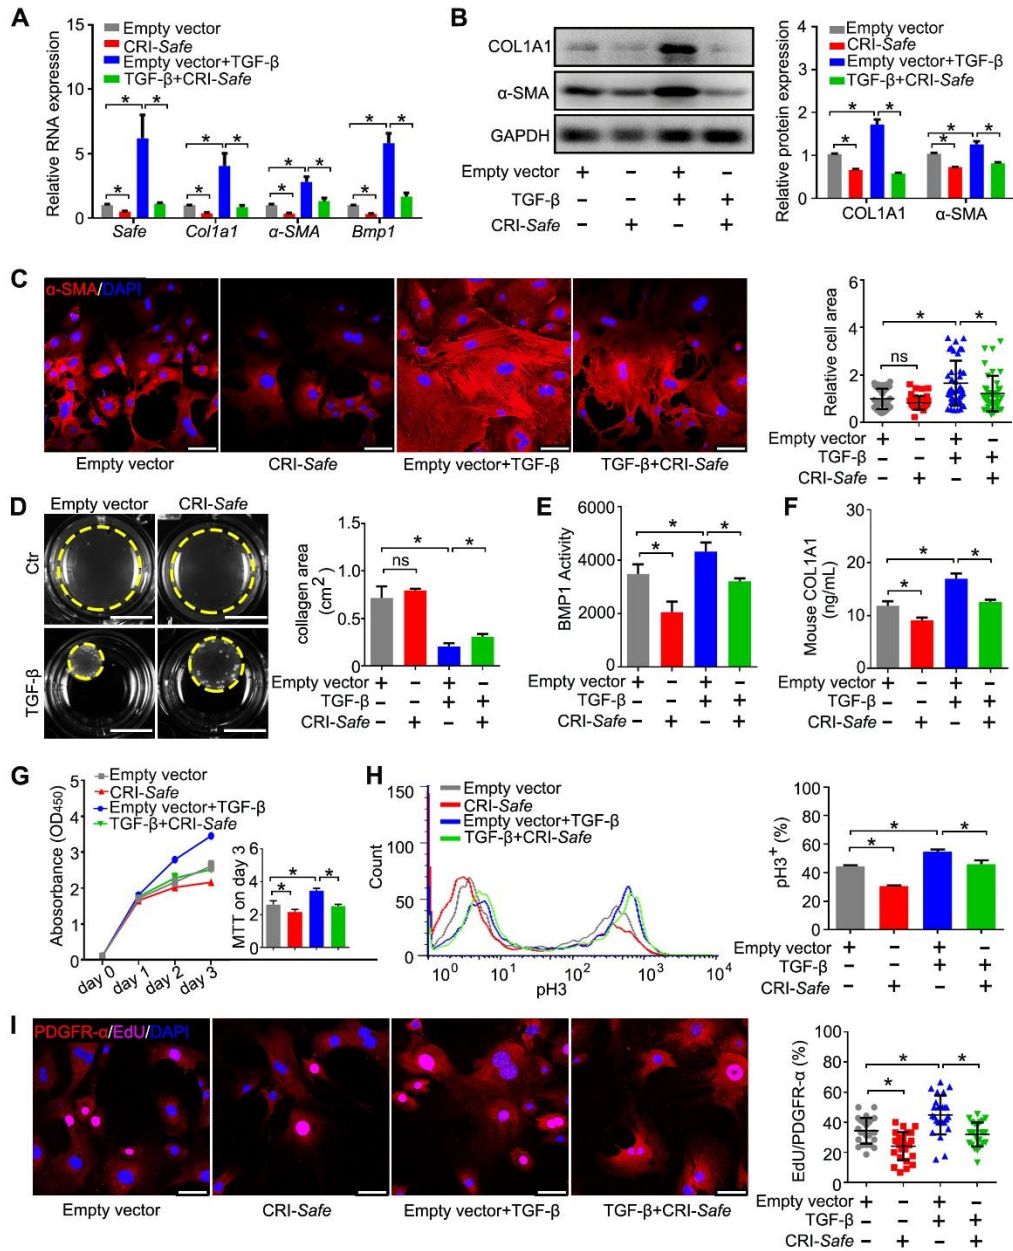

**Figure S2 CRISPR/Cas9-mediated *Safe* inhibition prevents TGF-β-induced cardiac fibrosis.** (A) qRT-PCR analysis showing inhibition of *Safe*, *Col1a1*, *α-SMA* and *Bmp1* expression in TGF-β-untreated or TGF-β-treated cardiac fibroblasts by CRISPR/Cas9-mediated *Safe* silence (n=3). (B) Representative western blot analysis and relative densitometric quantification of COL1A1 and α-SMA protein levels in TGF-β-untreated or TGF-β-treated cardiac fibroblasts after CRISPR/Cas9-mediated *Safe* inhibition (n=3). (C) Representative images of immunofluorescence staining for α-SMA (red, n=5) and quantification of the relative cell area of cardiac fibroblasts after treatments as indicated (n=40). Scale bar indicates 50 μm. (D) Representative images of collagen gel contraction for 24 hours and quantification of collagen area inside the dashed circles. (E) BMP1 protein enzyme activity in the supernatant of cultured fibroblasts

after indicated treatments. The excitation wavelength is 320 nm, the emission wavelength is 405 nm (n=3). (F) ELISA assay of COL1A1 protein in the supernatant of cultured fibroblasts after indicated treatments. (G) CCK-8 assay of cardiac fibroblasts showing repressed cell proliferation by CRISPR/Cas9-mediated *Safe* inhibition. (H) Flow cytometry analysis showing the ratio of pH3-positive cells was reduced by *Safe* inhibition (n=3). (I) Representative images of immunofluorescence staining and relative densitometric quantification for mitosis marker 5-ethynyl-2'-deoxyuridine (EdU, magenta) and DAPI (blue), PDGFR- $\alpha$  (red) was stained as a marker of fibroblasts. Scale bar indicates 50  $\mu$ m. Right panel: Percent of EdU<sup>+</sup> cells in PDGFR- $\alpha$ <sup>+</sup> cells (n=25). All data are presented as mean  $\pm$  SEM; Student's *t*-test or one-way ANOVA; \**p* < 0.05.

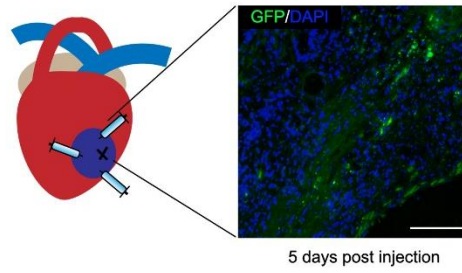

**Figure S3 Schematic diagram of lentivirus injection into the heart.** The lentiviral particles carrying GFP were injected into infarct area at three points. The detection of GFP-positive cells indicates successful lentiviral infection.

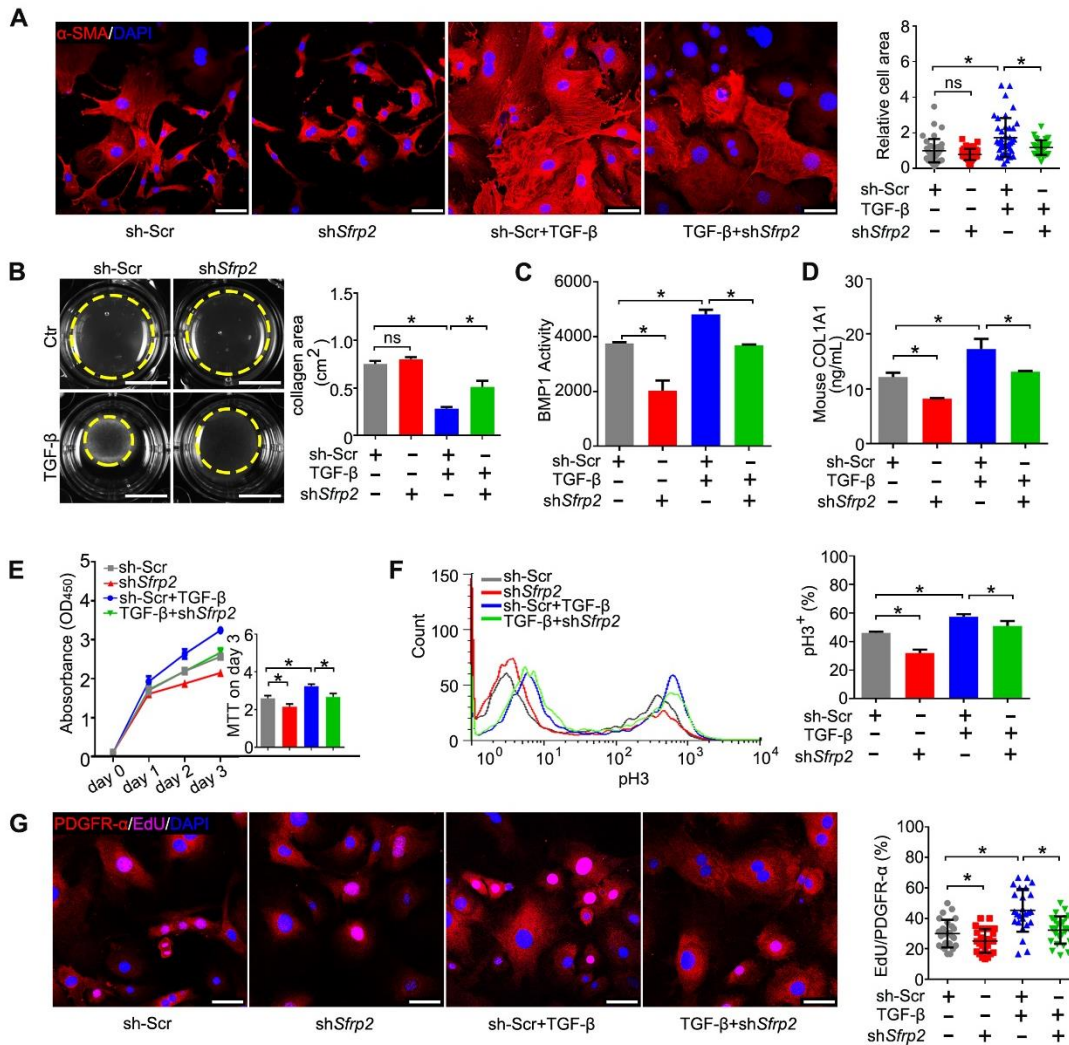

**Figure S4 *Sfrp2* knockdown restrains TGF- $\beta$ -induced cardiac fibrosis *in vitro*.** (A) Representative images of immunofluorescence staining for  $\alpha$ -SMA (red) and DAPI (blue), and quantification of the relative cell area of cardiac fibroblasts (n=40). Scale bar indicates 50  $\mu$ m. (B) Representative image of collagen gel contraction for 24 hours and quantification of collagen area inside the dashed circles (n=3). Scale bar indicates 0.5 cm. (C) BMP1 protein enzyme activity in the supernatant of cultured fibroblasts after indicated treatments (n=3). The excitation wavelength is 320 nm, while the emission wavelength is 405 nm. (D) ELISA assay of COL1A1 protein in the supernatant of cultured fibroblasts after indicated treatments. (E) CCK-8 assay of cardiac fibroblasts showing repressed cell proliferation by *Sfrp2* inhibition during TGF- $\beta$ -induced cardiac fibrosis. The cell proliferation rate was expressed as optical density value at 450 nm (OD<sub>450</sub>) wavelength. (F) Flow cytometry analysis showing the ratio of pH3-positive cells was reduced by *Sfrp2* inhibition (n=3). (G) Representative images of immunofluorescence staining and relative densitometric quantification for mitosis marker 5-ethynyl-2'-deoxyuridine (EdU, magenta) and DAPI (blue), PDGFR- $\alpha$  (red) was stained as a marker of

fibroblasts. Scale bar indicates 50  $\mu\text{m}$ . Right panel: Percent of EdU<sup>+</sup> cells in PDGFR- $\alpha$ <sup>+</sup> cells (n=25). All data are presented as mean  $\pm$  SEM; Student's *t*-test or one-way ANOVA; \**p* < 0.05.

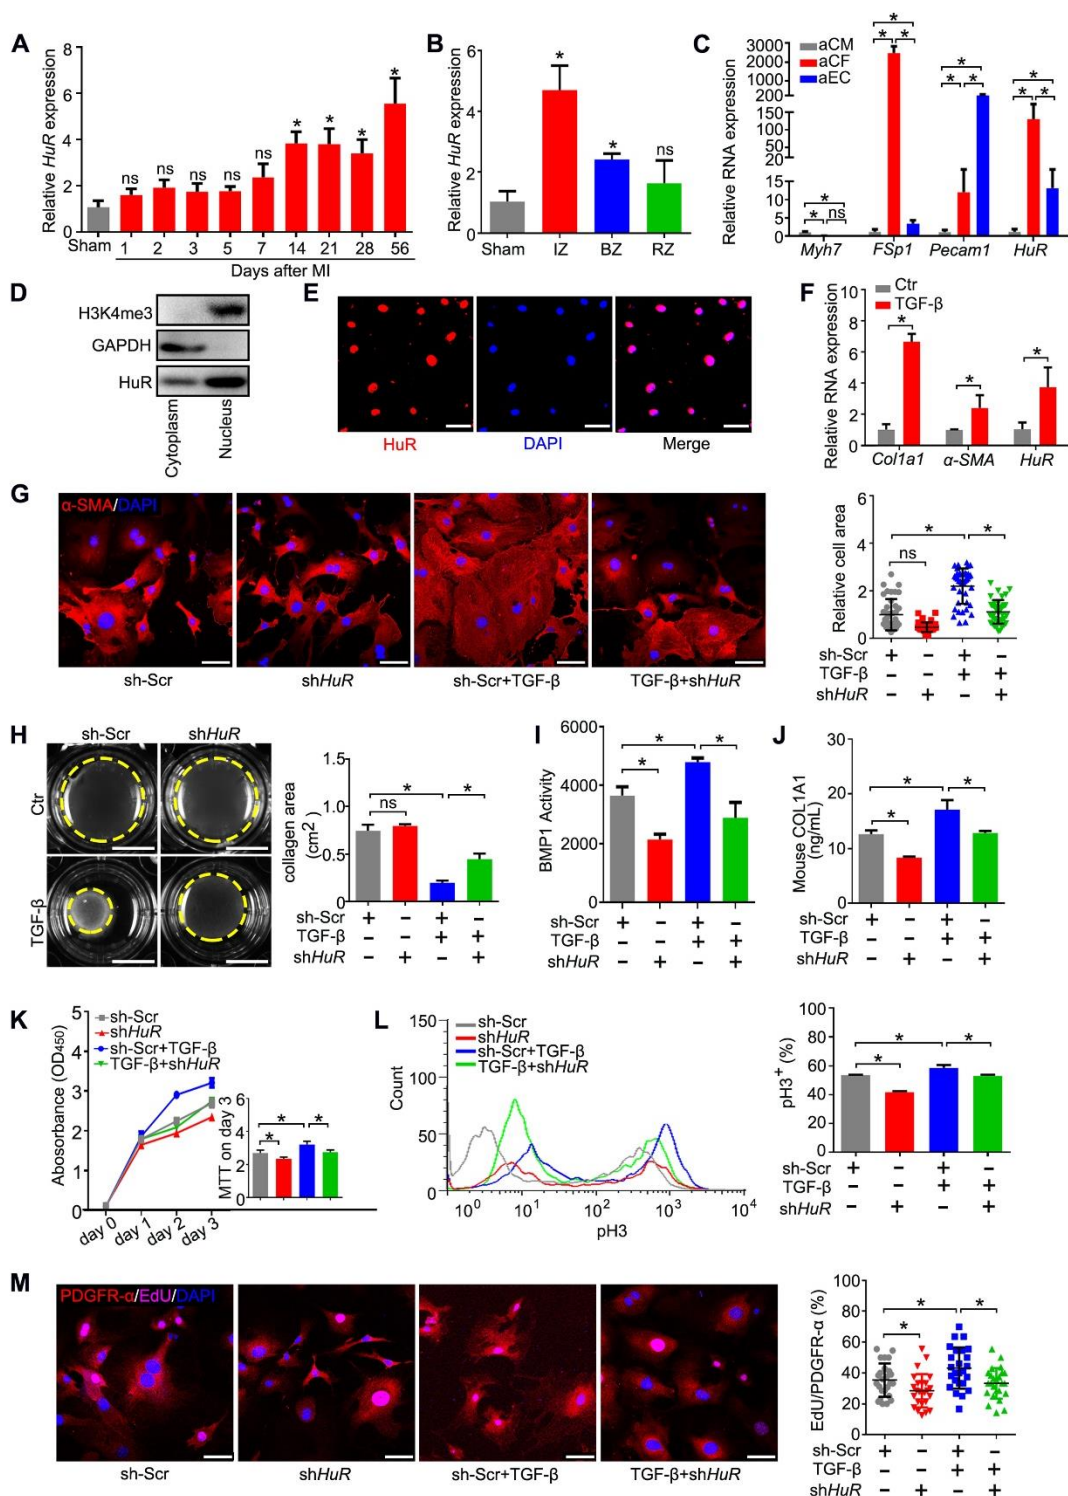

**Figure S5** *HuR* is involved in MI and TGF- $\beta$ -induced cardiac fibrosis. (A) qRT-PCR analysis of *HuR* expression in left ventricles of sham or MI hearts at indicated days post MI (n=3). (B) qRT-PCR detection of *HuR* expression in the infarct zone (IZ), border zone (BZ) and remote zone (RZ) of MI hearts at day 14



post-surgery (n=3). (C) qRT-PCR detection of *HuR* expression level in aCM, aCF and aEC (n=3). Representative images of western blot (D) and immunofluorescence staining (E) for HuR showing the nuclear localization of HuR in cardiac fibroblasts. The protein H3K4me3 and GAPDH were used as nuclear and cytosol protein markers, respectively. DAPI (blue) stained the nucleus. (F) qRT-PCR analysis showing increased expression of *HuR* mRNA in cardiac fibroblasts after TGF- $\beta$  treatment (n=3). (G) Representative images of immunofluorescence staining for  $\alpha$ -SMA (red) and DAPI (blue) in TGF- $\beta$ -treated cardiac fibroblasts (n=5). Scale bar indicates 50  $\mu$ m. Right panel: quantification of the relative cell area of cardiac fibroblasts (n=40). (H) Representative images of collagen gel contraction. Right panel: quantification of collagen area inside the dashed circles (n=3). Scale bar indicates 0.5 cm. (I) BMP1 protein enzyme activity in the supernatant of cultured fibroblasts after indicated treatments (n=3). The excitation wavelength is 320 nm, and the emission wavelength is 405 nm. (J) ELISA assay of secreted COL1A1 protein from TGF- $\beta$ -treated fibroblasts with or without *HuR* inhibition. (K) CCK-8 assay of cardiac fibroblasts showing repressed cell proliferation by *HuR* inhibition during TGF- $\beta$ -induced cardiac fibrosis. (L) Flow cytometry analysis showing the ratio of pH3-positive cells was reduced by *HuR* inhibition (n=3). (M) Representative images of immunofluorescence staining and relative densitometric quantification for mitosis marker 5-ethynyl-2'-deoxyuridine (EdU, magenta) and DAPI (blue), PDGFR- $\alpha$  (red) was stained as a marker of fibroblasts (n=4). Scale bar indicates 50  $\mu$ m. Right panel: Percent of EdU<sup>+</sup> cells in PDGFR- $\alpha$ <sup>+</sup> cells (n=25). All data are presented as mean  $\pm$  SEM; Student's *t*-test or one-way ANOVA; \**p* < 0.05 and ns, not significant.

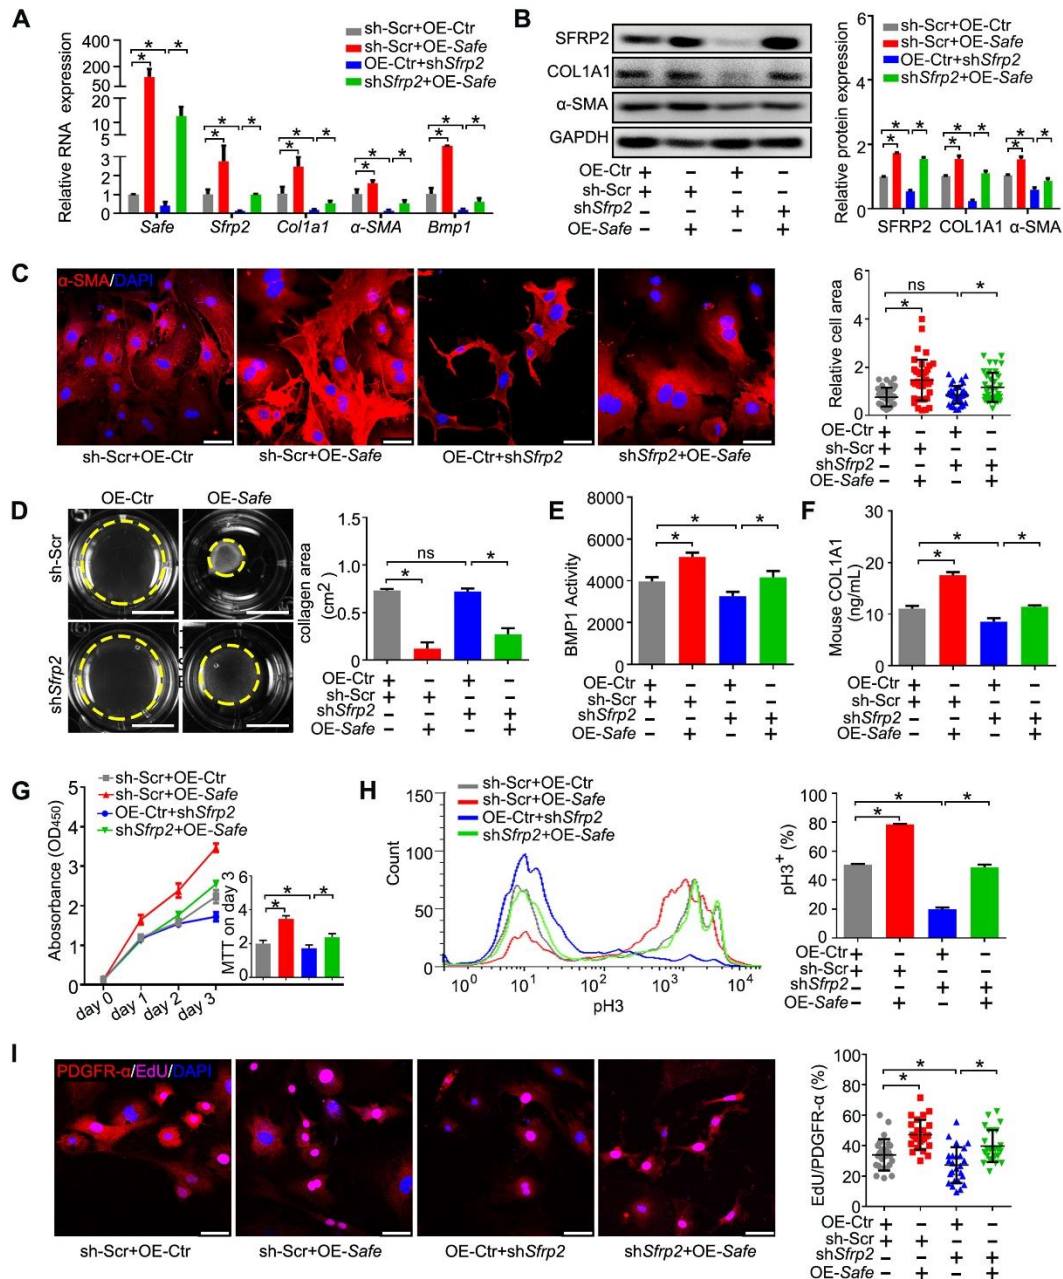

**Figure S6** *Safe* overexpression disturbed the regulatory effects of *shSfrp2* in cardiac fibroblasts. (A) qRT-PCR analysis showing mRNA expression of *Safe*, *Sfrp2*, *Col1a1*,  $\alpha$ -SMA and *Bmp1* by *Safe* overexpression in *Sfrp2*-silenced cardiac fibroblasts (n=3). (B) Representative western blot analysis and relative densitometric quantification showing up-regulated expression of SFRP2, COL1A1 and  $\alpha$ -SMA proteins by *Safe* overexpression in *Sfrp2*-silenced cardiac fibroblasts (n=3). (C) Representative images of immunofluorescence staining for  $\alpha$ -SMA (red) and quantification of the relative cell area of cardiac fibroblasts after treatments as indicated (n=40). Scale bar indicates 50  $\mu$ m. (D) Representative images of collagen gel contraction for 24 hours and quantification of collagen area inside the dashed circles (n=3). (E) BMP1 activity assay. (F) Mouse COL1A1 protein levels. (G) Cell viability (OD<sub>450</sub>) and MTT assay. (H) Flow cytometry for pH3<sup>+</sup> cells. (I) Immunofluorescence for PDGFR- $\alpha$  and EdU, and quantification of EdU/PDGFR- $\alpha$ <sup>+</sup> cells.

Scale bar indicates 0.5 cm. (E) BMP1 protein enzyme activity in the supernatant of cultured fibroblasts after indicated treatments (n=3). The excitation wavelength is 320 nm, while the emission wavelength is 405 nm. (F) ELISA assay of COL1A1 protein in the supernatant of cultured fibroblasts after indicated treatments (n=3). (G) CCK-8 assay of cardiac fibroblasts showing restored cell proliferation by *Safe* overexpression in *Sfrp2*-deficient cardiac fibroblasts (n=3). (H) Flow cytometry analysis of pH3 incorporation in *Safe* overexpressed-stimulated fibroblasts with indicated treatments. (I) Representative images of immunofluorescence staining for EdU (magenta), PDGFR- $\alpha$  (red) and DAPI (blue), n=4. Scale bar indicates 50  $\mu$ m. Right panel: Percent of EdU<sup>+</sup> cells in PDGFR- $\alpha$ <sup>+</sup> cells, (n=25). All data are presented as mean  $\pm$  SEM; Student's *t*-test or one-way ANOVA; \**p* < 0.05.

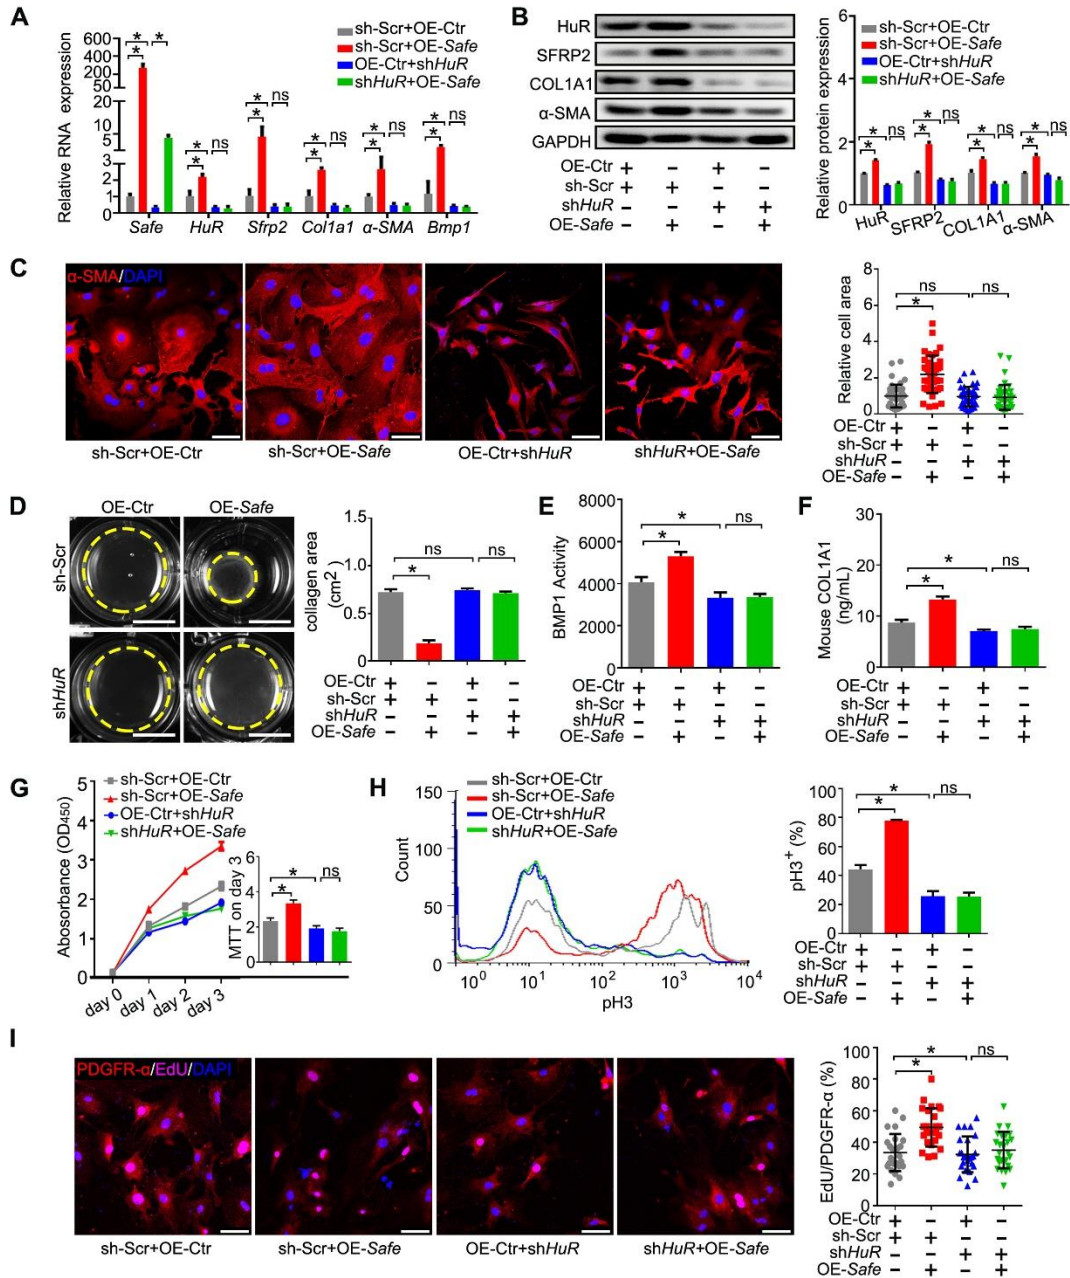

**Figure S7** *Safe* overexpression failed to reverse the phenotype changes of cardiac fibroblasts induced by *HuR* shRNAs. (A) qRT-PCR analysis showing mRNA expression of *Safe*, *HuR*, *Sfrp2*, *Col1a1*,  $\alpha$ -SMA and *Bmp1* by *Safe* overexpression in *HuR*-silenced cardiac fibroblasts (n=3). (B) Representative western blot analysis and relative densitometric quantification showing expression of *HuR*, SFRP2, COL1A1 and  $\alpha$ -SMA proteins by *Safe* overexpression in *HuR*-silenced cardiac fibroblasts (n=3). (C) Representative images of immunofluorescence staining for  $\alpha$ -SMA (red, n=5) and quantification of the relative cell area of cardiac fibroblasts after treatments as indicated (n=40). Scale bar indicates 50  $\mu$ m. (D) Representative images of collagen gel contraction for 24 hours and quantification of collagen area

inside the dashed circles (n=3). Scale bar indicates 0.5 cm. (E) BMP1 protein enzyme activity in the supernatant of cultured fibroblasts after indicated treatments (n=3). The excitation wavelength is 320 nm, and the emission wavelength is 405 nm. (F) ELISA assay of COL1A1 protein in the supernatant of cultured fibroblasts after indicated treatments (n=3). (G) CCK-8 assay of cardiac fibroblasts showing failed to restore cell proliferation by *Safe* overexpression in *HuR*-deficient cardiac fibroblasts (n=3). (H) Flow cytometry analysis of pH3 incorporation in *Safe* overexpressed-stimulated fibroblasts with indicated treatments. (I) Representative images of immunofluorescence staining for EdU (magenta), PDGFR- $\alpha$  (red) and DAPI (blue). Scale bar indicates 50  $\mu$ m. Right panel: Percent of EdU<sup>+</sup> cells in PDGFR- $\alpha$ <sup>+</sup> cells (n=25). All data are presented as mean  $\pm$  SEM; Student's *t*-test or one-way ANOVA; \**p* < 0.05.

**Table S1 The primer list for RACE assay, *in vitro* translation assay and construction of luciferase reporter pGL3-control vectors carrying various *Safe* fragments or the 3'-UTR of *Sfrp2***

|                          |               |                                          |                                            |
|--------------------------|---------------|------------------------------------------|--------------------------------------------|
| <i>Safe</i>              | 5' RACE       | GCCACTGTCAGCTCGGCTCCAACGC                |                                            |
|                          | 3' RACE       | TCTGGCTGAAATGTGGGGTACATGCT               |                                            |
|                          | 1bp-1517bp    | Sense:                                   | GCTCTAGAAGAGCCCAGCAAGTAACCCTT              |
|                          |               | Antisense:                               | CCCCGGCCGGCCCCCTCTGTGGTCTAAGCTTGTGG        |
|                          | 1bp-528bp     | Sense:                                   | GCTCTAGAAGAGCCCAGCAAGTAACCCTT              |
|                          |               | Antisense:                               | CCCCGGCCGGCCGAGGTACCACTGCAGCCACA           |
|                          | 529bp-1055bp  | Sense:                                   | GCTCTAGACTCCGGAGCCCAGGTCAC                 |
|                          |               | Antisense:                               | CCCCGGCCGGCCTTCTTTGTCTTCTGTCATGTCTCCT      |
|                          | 1056bp-1517bp | Sense:                                   | GCTCTAGATAGGTACAACAAGATGTAAAGTTTATATACAA   |
|                          |               | Antisense:                               | CCCCGGCCGGCCCCCTCTGTGGTCTAAGCTTGTGG        |
| 938bp-1412bp             | Sense:        | CCACTGGAGTAGCTGGTAACTTC                  |                                            |
|                          | Antisense:    | CAAACATTTTCGTTGCTCGTTTT                  |                                            |
| Sense-T7                 | Sense:        | TAATACGACTCACTATAAGAGCCCAGCAAGTAACCCTTTA |                                            |
|                          | Antisense:    | TTACCCTCTGTGGTCTAAGCTTGTGG               |                                            |
| Antisense-T7             | Sense:        | TAATACGACTCACTATAACCCTCTGTGGTCTAAGCTTGTG |                                            |
|                          | Antisense:    | TTAAGAGCCCAGCAAGTAACCCT                  |                                            |
| <i>Sfrp2</i><br>(3'-UTR) | 1110bp-2001bp | Sense:                                   | GCTCTAGA TTTCCCAGTGGGGTGGCTTC              |
|                          |               | Antisense:                               | CCCCGGCCGGCCTAGGTACAACAAGATGTAAAGTTTATATAC |
|                          | 1110bp-1539bp | Sense:                                   | GCTCTAGACCCAGTGGGGTGGCTTCTCT               |
|                          |               | Antisense:                               | CCCCGGCCGGCCGCTGACATGGCAACCTAAGTG          |
|                          | 1540bp-2001bp | Sense:                                   | GCTCTAGACCCTCTGTGGTCTAAGCTTGTGG            |
|                          |               | Antisense:                               | CCCCGGCCGGCCTGTTTATCTGAAATATTTACAGTGTCGG   |

**Table S2 The sequences of shRNA or gRNA targeting *Safe*, *Sfrp2* and *HuR*, and primers used to amplify the full length of *Sfrp2* CDS region.**

|              |                 |                                                                                                                                                   |
|--------------|-----------------|---------------------------------------------------------------------------------------------------------------------------------------------------|
| <i>Safe</i>  | shRNA           | Sense:<br>GATCCGAATCTCCAGCAATACACATTCAAGAGATGTGTATTGCTGGAGATTCTTTTTG<br>Antisense:<br>AATTCAAAAAGAATCTCCAGCAATACACATCTCTTGAATGTGTATTGCTGGAGATTTCG |
|              | gRNA1           | Sense:<br>CACCGCATAGGTTTGAATCCGAACC<br>Antisense:<br>AAACGGTTCGGATTCAAACCTATGC                                                                    |
|              | gRNA2           | Sense:<br>CACCGCGCGGTACCTGCTCGAGCT<br>Antisense:<br>AAACAGCTCGAGCAGGTACCCGCGC                                                                     |
|              | Over-expression | Sense:<br>GCTCTAGAAAGAGCCCAGCAAGTAACCCCTT<br>Antisense:<br>CGGAATCCCCTCTGTGGTCTAAGCTTGTGG                                                         |
| <i>Sfrp2</i> | shRNA           | Sense:<br>GATCCGCCCATCCAGATCTTGTACTTCAAGAGAGTACAAGATCTGGATGGGCTTTTTG<br>Antisense:<br>AATTCAAAAAGCCCATCCAGATCTTGTACTCTCTTGAAGTACAAGATCTGGATGGGCG  |
|              | Over-expression | Sense:<br>CGGAATTCGCCACCATGCCGCGGGGCCCTGCC<br>Antisense:<br>CGGGATCCCTAGCATTGCAGCTTGC GGATGC                                                      |
| <i>HuR</i>   | shRNA           | Sense:<br>GATCCGAAGCTGCAATGGCCATAGTTCAAGAGACTATGGCCATTGCAGCTCTTTTTG<br>Antisense:<br>AATTCAAAAAGAAGCTGCAATGGCCATAGTCTCTTGAAGTACAAGATCTGGATGGGCG   |

**Table S3 The primer list for qRT-PCR.**

| Gene name       | Sense (5'→3')         | Antisense (5'→3')       |
|-----------------|-----------------------|-------------------------|
| <i>Safe</i>     | GGGAGAGTGTAGCAGAGTCC  | ATGTAGGAGGACCCGCAGAA    |
| <i>Meg3</i>     | ACACACGGACACAGACACC   | TGGGTCTCTCTACTCAAGGG    |
| <i>Sfrp2</i>    | CCACAGAGGAAGCTCCCAA   | GGTGTCTCTGTTGATGTACGTT  |
| <i>AK045784</i> | CTTCCTGTCCTTCCAAATAA  | CTCGTGGCTTACTGCTATTC    |
| <i>AK039829</i> | GACAAGAGGTTCCGCAGGGTA | CCATTCATTCCAGTTAGTCATCG |
| <i>AK009088</i> | TAGCCAATAAGCACAACAGC  | GGTAGGTTGACTCTTCGGAA    |
| <i>AK009418</i> | ACTTAGTTTCTGAGCCCTGA  | ATTCCGTCCTGTAACAAAGA    |
| <i>uc008hbv</i> | GCGTGTCTATGAAGTACCA   | TCTTCAGAGTTGTAGGCAGC    |
| <i>AK020603</i> | GCTCTTGCTCCCTCTTATGCT | AGGCTCAATGACGATGCTTAGA  |
| <i>18S</i>      | GTAACCCGTTGAACCCATT   | CCATCCAATCGGTAGTAGCG    |
| <i>Gapdh</i>    | GGTGAAGGTCGGTGTGAACG  | CTCGCTCCTGGAAGATGGTG    |
| <i>U6</i>       | GTGCTCGCTTCGGCAGCA    | GGAACGCTTCACGAATTTGC    |
| <i>α-SMA</i>    | CCCCCTCTAGTGGTCAGGAA  | ACGCTCTCAAATACCCCGTT    |
| <i>Col1a1</i>   | CCGAACCCCAAGGAAAAGA   | GTGGACATTAGGCGCAGGA     |
| <i>FSp1</i>     | GCTGCCCAGATAAGGAACCC  | TGCGAAGAAGCCAGAGTAAGG   |
| <i>Myh7</i>     | AAGGGCCTGAATGAGGAGTA  | AAAGGCTCCAGGTCTGAGG     |
| <i>HuR</i>      | AAACATGGCTCTCCTCTCGC  | ACCCATAGGGGAGAACCTGA    |
| <i>Pecam1</i>   | GGCACACCTGTAGCCAACTTC | GCCGCTTCTCTTGACCACTT    |
| <i>Bmp1</i>     | ACTACACCTACGACCTGGGC  | TTTGATGGATGGCCTTCGGG    |
| <i>Postn</i>    | TGTGGGGTAGGAACTGAGGA  | CTTCCTGAGGCGGAAGGTTT    |
| <i>Col3a1</i>   | TCCCCTGGAATCTGTGAATC  | TGAGTCGAATTGGGGAGAAT    |



**Table S4 The probe list used in EMSA.**

|                    |                                 |
|--------------------|---------------------------------|
| Probe 1F-biotin    | AAGUUUAUAUACAAAGAAUUAUAUGUUUAU  |
| Probe 1R-unlabeled | AUAAACAUAUAUUCUUUGUAUAUAAACUU   |
| Probe 2F-biotin    | CUACAAUGAUUUAGUUUGCAAAAAAAAAUGA |
| Probe 2R-unlabeled | UCAUUUUUUUGCAAACUAAAUCAUUGUAG   |
| Probe 3F-biotin    | UGAAUUAAGAUGUUUAAAACAAAGCUUA    |
| Probe 3R-unlabeled | UAAGCUUUGUUAAAACAUCUUUAAUUCA    |
| Probe 4F-biotin    | CGAGCAACGAAAUGUUUGAAGACUUAGAUG  |
| Probe-4R-unlabeled | CAUCUAAGUCUCAAACAUUUCGUUGCUCG   |

**Table S5 The lncRNAs differentially expressed between tissues from infarct zone (IZ) and remote zone (RZ).**

| ProbeName              | IZ-1     | IZ-2     | RZ-1     | RZ-2     | p_IZ_vs_RZ | fold_IZ_vs_RZ | GeneSymbol | SeqID    | location   | overlapped_gene |
|------------------------|----------|----------|----------|----------|------------|---------------|------------|----------|------------|-----------------|
| CUST_5502_PI419771968  | 14.84883 | 14.639   | 10.29681 | 9.745277 | 0.019575   | 4.722875      | Ptn        | uc009biz | Intergenic | NA              |
| CUST_13004_PI419771968 | 10.19638 | 8.878916 | 4.003442 | 5.630894 | 0.049556   | 4.720479      | NA         | AK169965 | Sense      | Mmp12           |
| CUST_12561_PI419771968 | 9.72405  | 8.946613 | 4.140127 | 5.14823  | 0.021215   | 4.691153      | NA         | AK089297 | Sense      | Gpnmb           |
| CUST_12946_PI419771968 | 9.149141 | 9.814359 | 5.580841 | 4.917067 | 0.0121     | 4.232796      | NA         | AK162395 | Sense      | Kcnma1          |
| CUST_3617_PI419771968  | 8.451489 | 9.124411 | 5.290115 | 4.304183 | 0.029488   | 3.990801      | AK077272   | uc008afh | Intergenic | NA              |
| CUST_10732_PI419771968 | 9.605808 | 9.325877 | 5.568197 | 5.583089 | 0.022525   | 3.8902        | NA         | AK044494 | Sense      | Klhl29          |
| CUST_2235_PI419771968  | 10.50582 | 10.43204 | 6.802367 | 6.378015 | 0.030033   | 3.878736      | AK136017   | uc007ile | Sense      | Slit3           |
| CUST_12083_PI419771968 | 9.715947 | 10.31435 | 6.740719 | 5.697182 | 0.04096    | 3.796197      | NA         | AK082557 | Antisense  | Gm11149         |
| CUST_1510_PI419771968  | 16.76071 | 16.36178 | 12.95679 | 12.59084 | 0.00522    | 3.787429      | NA         | AK159300 | Sense      | Col1a1          |
| CUST_10889_PI419771968 | 9.812981 | 8.71857  | 5.073944 | 6.12672  | 0.040452   | 3.665444      | NA         | AK046559 | Sense      | Ms4a7           |
| CUST_781_PI419771968   | 13.58794 | 13.62626 | 10.26196 | 9.836924 | 0.036548   | 3.557659      | NA         | AK046686 | Intergenic | NA              |
| CUST_8583_PI419771968  | 10.17487 | 9.915772 | 6.746323 | 6.261502 | 0.015301   | 3.541406      | NA         | AK018031 | Sense      | Ptk2b           |
| CUST_2689_PI419771968  | 7.279145 | 7.820086 | 4.327397 | 4.051961 | 0.020911   | 3.359937      | Gtl2       | uc007pat | Intergenic | NA              |
| CUST_10588_PI419771968 | 8.573981 | 8.133397 | 5.228601 | 4.774037 | 0.008827   | 3.352371      | NA         | AK042906 | Sense      | Unc5c           |
| CUST_2687_PI419771968  | 13.67454 | 13.16217 | 10.25275 | 9.90526  | 0.013017   | 3.339349      | Gtl2       | uc007par | Intergenic | NA              |
| CUST_10145_PI419771968 | 10.44971 | 10.00365 | 6.800575 | 7.053255 | 0.013706   | 3.299763      | NA         | AK037708 | Sense      | Runx1           |
| CUST_13039_PI419771968 | 8.540566 | 8.912185 | 5.402096 | 5.470919 | 0.030476   | 3.289868      | NA         | AB063319 | Intergenic | NA              |
| CUST_10257_PI419771968 | 10.33183 | 10.57825 | 7.117573 | 7.215513 | 0.010416   | 3.288496      | NA         | AK038732 | Sense      | Gria3           |
| CUST_8766_PI419771968  | 7.608441 | 7.324596 | 4.387299 | 4.059848 | 0.004812   | 3.242945      | NA         | AK019526 | Sense      | Loxl1           |
| CUST_11344_PI419771968 | 11.36858 | 11.55971 | 8.506542 | 8.027197 | 0.025639   | 3.197275      | NA         | AK051693 | Intergenic | NA              |
| CUST_1029_PI419771968  | 11.57126 | 11.09548 | 8.350982 | 7.95395  | 0.010396   | 3.180903      | NA         | AK081334 | Intergenic | NA              |
| CUST_12423_PI419771968 | 6.040756 | 6.463502 | 3.465196 | 2.767417 | 0.027746   | 3.135823      | NA         | AK086575 | Sense      | Dclre1c         |
| CUST_9899_PI419771968  | 12.04279 | 11.81491 | 8.847862 | 8.750848 | 0.009      | 3.129492      | NA         | AK035258 | Sense      | Synpo2          |
| CUST_5413_PI419771968  | 10.45513 | 10.16648 | 7.569342 | 6.862988 | 0.04332    | 3.09464       | AK008014   | uc008zxj | Antisense  | Abhd11          |
| CUST_11987_PI419771968 | 9.846146 | 9.361053 | 6.292346 | 6.742613 | 0.011505   | 3.08612       | NA         | AK081565 | Intergenic | NA              |
| CUST_12722_PI419771968 | 9.612109 | 9.312686 | 6.569526 | 6.236202 | 0.005561   | 3.059534      | NA         | AK137012 | Sense      | Csmd1           |
| CUST_2690_PI419771968  | 11.62414 | 11.5817  | 8.803762 | 8.351896 | 0.045695   | 3.025087      | Gtl2       | uc007pav | Intergenic | NA              |
| CUST_9920_PI419771968  | 8.386811 | 8.345634 | 5.308845 | 5.373652 | 0.000509   | 3.024974      | NA         | AK035449 | Sense      | Foxp2           |

|                        |          |          |          |          |          |          |          |          |            |          |
|------------------------|----------|----------|----------|----------|----------|----------|----------|----------|------------|----------|
| CUST_4263_PI419771968  | 7.165568 | 7.658231 | 4.322906 | 4.481532 | 0.034763 | 3.009681 | AK138201 | uc008jko | Antisense  | Dab2ip   |
| CUST_2695_PI419771968  | 11.58511 | 11.76209 | 8.934245 | 8.411436 | 0.03607  | 3.000761 | AJ517767 | uc007pbd | Intergenic | NA       |
| CUST_9717_PI419771968  | 10.52472 | 10.79638 | 8.029128 | 7.42673  | 0.034219 | 2.93262  | NA       | AK033438 | Sense      | Lmo4     |
| CUST_2685_PI419771968  | 13.46428 | 12.81267 | 9.997694 | 10.55047 | 0.023022 | 2.864398 | AK157178 | uc007pap | Intergenic | NA       |
| CUST_683_PI419771968   | 7.89675  | 8.011162 | 5.134735 | 5.080219 | 0.003148 | 2.846479 | NA       | AK039829 | Intergenic | NA       |
| CUST_10842_PI419771968 | 8.957013 | 9.043117 | 6.340978 | 5.976472 | 0.031749 | 2.84134  | NA       | AK045784 | Intergenic | NA       |
| CUST_11897_PI419771968 | 8.393419 | 8.847528 | 6.108392 | 5.512974 | 0.020801 | 2.80979  | NA       | AK080487 | Sense      | Unc5c    |
| CUST_11141_PI419771968 | 8.515246 | 8.002893 | 5.218044 | 5.689126 | 0.01535  | 2.805485 | NA       | AK048773 | Sense      | Kcnma1   |
| CUST_4671_PI419771968  | 8.978911 | 8.538985 | 5.558345 | 6.379756 | 0.048344 | 2.789898 | AK137033 | uc008ppm | Antisense  | Sfrp2    |
| CUST_3208_PI419771968  | 7.062229 | 7.570456 | 4.621547 | 4.471764 | 0.042223 | 2.769687 | BC023070 | uc007vda | Intergenic | NA       |
| CUST_1895_PI419771968  | 10.81545 | 10.4075  | 8.199606 | 7.50637  | 0.034728 | 2.758485 | AK145301 | uc007edt | Antisense  | Sertad4  |
| CUST_10583_PI419771968 | 9.901871 | 9.776586 | 7.263694 | 6.90619  | 0.024386 | 2.754287 | NA       | AK042874 | Sense      | Lrrc16a  |
| CUST_10933_PI419771968 | 9.049584 | 8.726994 | 6.089533 | 6.181569 | 0.025626 | 2.752738 | NA       | AK046963 | Sense      | Cdk14    |
| CUST_9645_PI419771968  | 10.49411 | 10.90232 | 8.046375 | 7.848131 | 0.019813 | 2.750963 | NA       | AK032779 | Sense      | Ncam1    |
| CUST_2448_PI419771968  | 10.02906 | 9.901371 | 7.332767 | 7.130272 | 0.004225 | 2.733697 | Gm885    | uc007lzk | Antisense  | Polg2    |
| CUST_7718_PI419771968  | 12.10429 | 12.17048 | 9.474507 | 9.455208 | 0.004108 | 2.672525 | NA       | AK014707 | Sense      | Enpp1    |
| CUST_10908_PI419771968 | 9.673073 | 10.36822 | 7.784429 | 6.964737 | 0.040954 | 2.646063 | NA       | AK046743 | Sense      | Dclk1    |
| CUST_11755_PI419771968 | 7.891607 | 7.927107 | 5.189428 | 5.342434 | 0.013284 | 2.643426 | NA       | AK078197 | Sense      | Runx2    |
| CUST_7403_PI419771968  | 7.266341 | 6.983739 | 4.721337 | 4.314011 | 0.013068 | 2.607366 | NA       | AK011385 | Sense      | Nav1     |
| CUST_1010_PI419771968  | 10.62572 | 10.25362 | 7.916143 | 7.76247  | 0.023179 | 2.600363 | NA       | AK080501 | Intergenic | NA       |
| CUST_12897_PI419771968 | 9.629893 | 9.574684 | 6.981317 | 7.024742 | 0.000268 | 2.599259 | NA       | AK155750 | Sense      | Lilrb4   |
| CUST_12975_PI419771968 | 7.798883 | 7.563833 | 5.106144 | 5.140759 | 0.026095 | 2.557907 | NA       | AK164022 | Sense      | Itga4    |
| CUST_12563_PI419771968 | 8.630685 | 8.676999 | 6.161964 | 6.063295 | 0.003104 | 2.541213 | NA       | AK089314 | Sense      | Lilrb4   |
| CUST_6342_PI419771968  | 8.430329 | 8.02405  | 5.372071 | 6.002295 | 0.031182 | 2.540007 | AK004221 | uc009nrm | Antisense  | Gm20388  |
| CUST_11357_PI419771968 | 10.02194 | 9.740517 | 7.564173 | 7.136129 | 0.015998 | 2.531078 | NA       | AK051822 | Sense      | Tgfb2    |
| CUST_10872_PI419771968 | 10.17979 | 10.37406 | 7.943686 | 7.559042 | 0.019489 | 2.525559 | NA       | AK046232 | Sense      | Serpine2 |
| CUST_9065_PI419771968  | 8.763352 | 8.35335  | 5.867248 | 6.21923  | 0.012189 | 2.515112 | NA       | AK020555 | Sense      | Antxr1   |
| CUST_3165_PI419771968  | 8.497348 | 8.593107 | 5.972018 | 6.154403 | 0.006156 | 2.482017 | AK079958 | uc007uwp | Intergenic | NA       |
| CUST_8364_PI419771968  | 9.589382 | 9.135541 | 7.082455 | 6.695372 | 0.015299 | 2.473548 | NA       | AK017175 | Sense      | Adam12   |
| CUST_9271_PI419771968  | 8.232893 | 8.242259 | 5.791991 | 5.778211 | 3.87E-05 | 2.452475 | NA       | AK021285 | Intergenic | NA       |
| CUST_10899_PI419771968 | 8.000402 | 8.283775 | 5.985748 | 5.406669 | 0.038355 | 2.44588  | NA       | AK046626 | Antisense  | Bnc2     |

|                        |          |          |          |          |          |          |               |          |            |               |
|------------------------|----------|----------|----------|----------|----------|----------|---------------|----------|------------|---------------|
| CUST_9094_PI419771968  | 12.66715 | 12.75244 | 10.49048 | 10.09285 | 0.043405 | 2.41813  | NA            | AK020657 | Sense      | Pdzn3         |
| CUST_9458_PI419771968  | 10.29846 | 9.923447 | 7.712616 | 7.68425  | 0.048202 | 2.412521 | NA            | AK030568 | Intergenic | NA            |
| CUST_11010_PI419771968 | 8.913722 | 8.191298 | 5.946702 | 6.367089 | 0.046681 | 2.395615 | NA            | AK047681 | Sense      | Pcdh9         |
| CUST_8952_PI419771968  | 10.81215 | 10.58968 | 8.36908  | 8.356112 | 0.029731 | 2.338314 | NA            | AK020229 | Sense      | Stambpl1      |
| CUST_8380_PI419771968  | 10.45087 | 9.858559 | 7.493247 | 8.146379 | 0.034539 | 2.3349   | NA            | AK017233 | Sense      | Aff3          |
| CUST_1572_PI419771968  | 11.30132 | 10.9338  | 8.855254 | 8.711308 | 0.027841 | 2.334278 | NA            | AK168001 | Intergenic | NA            |
| CUST_7538_PI419771968  | 7.001927 | 6.701077 | 4.504325 | 4.539449 | 0.03857  | 2.329615 | NA            | AK013470 | Intergenic | NA            |
| CUST_12801_PI419771968 | 8.231805 | 8.115468 | 6.036429 | 5.651734 | 0.03672  | 2.329555 | NA            | AK142062 | Sense      | Ptprj         |
| CUST_8702_PI419771968  | 9.670571 | 8.962562 | 6.737577 | 7.270058 | 0.040571 | 2.312749 | NA            | AK018648 | Sense      | Itpk1         |
| CUST_4459_PI419771968  | 6.515592 | 6.910253 | 4.561649 | 4.274797 | 0.014768 | 2.2947   | AK031463      | uc008mrt | Intergenic | NA            |
| CUST_11731_PI419771968 | 11.15449 | 10.99798 | 8.936894 | 8.634321 | 0.015246 | 2.290626 | NA            | AK077892 | Sense      | Kalrn         |
| CUST_9754_PI419771968  | 11.5403  | 11.25984 | 9.196724 | 9.034686 | 0.011401 | 2.284367 | NA            | AK034008 | Sense      | Pcdh9         |
| CUST_6440_PI419771968  | 13.97512 | 13.84392 | 11.67676 | 11.58262 | 0.002077 | 2.27983  | AK141402      | uc009pal | Sense      | 2610203C20Rik |
| CUST_2097_PI419771968  | 10.75548 | 10.42422 | 8.479392 | 8.249958 | 0.012029 | 2.225177 | AK038827      | uc007gvs | Sense      | Tmcc3         |
| CUST_9012_PI419771968  | 8.5511   | 8.21229  | 6.320454 | 6.032687 | 0.010895 | 2.205125 | NA            | AK020424 | Sense      | Odz3          |
| CUST_1780_PI419771968  | 9.967793 | 10.30537 | 8.098991 | 7.782277 | 0.01107  | 2.195948 | AK192563      | uc007ctb | Sense      | Shisa4        |
| CUST_11233_PI419771968 | 8.172631 | 8.457986 | 6.332979 | 5.910809 | 0.019356 | 2.193415 | NA            | AK050122 | Sense      | Apol9a        |
| CUST_3190_PI419771968  | 9.715022 | 9.251226 | 7.17997  | 7.415363 | 0.031492 | 2.185458 | B930095G15Rik | uc007vab | Sense      | Farp1         |
| CUST_9398_PI419771968  | 12.94391 | 12.65599 | 10.61772 | 10.61549 | 0.041903 | 2.183347 | NA            | AK029601 | Sense      | Bicc1         |
| CUST_940_PI419771968   | 9.684195 | 9.745506 | 7.633944 | 7.439393 | 0.017148 | 2.178182 | NA            | AK078071 | Sense      | Celf4         |
| CUST_9276_PI419771968  | 10.17518 | 9.964663 | 7.666795 | 8.173914 | 0.044621 | 2.149565 | NA            | AK021303 | Sense      | Ccdc80        |
| CUST_12998_PI419771968 | 12.16504 | 12.10751 | 10.16419 | 9.822019 | 0.045138 | 2.143171 | NA            | AK166199 | Intergenic | NA            |
| CUST_10074_PI419771968 | 11.28097 | 11.34915 | 9.337783 | 9.082014 | 0.027948 | 2.105161 | NA            | AK037075 | Sense      | Arid5b        |
| CUST_10249_PI419771968 | 7.499063 | 7.394799 | 5.42523  | 5.284966 | 0.002574 | 2.091833 | NA            | AK038647 | Intergenic | NA            |
| CUST_9837_PI419771968  | 8.765991 | 9.124508 | 7.099331 | 6.620612 | 0.024301 | 2.085278 | NA            | AK034700 | Sense      | Rai14         |
| CUST_9266_PI419771968  | 8.108993 | 8.532529 | 6.32752  | 6.149996 | 0.036367 | 2.082003 | NA            | AK021264 | Sense      | Nfat5         |
| CUST_6906_PI419771968  | 8.798566 | 8.487    | 6.559456 | 6.636988 | 0.037486 | 2.044561 | NA            | AK005401 | Intergenic | NA            |
| CUST_8528_PI419771968  | 9.312966 | 9.112044 | 7.096156 | 7.259057 | 0.004778 | 2.034899 | NA            | BC028775 | Sense      | Adc           |
| CUST_9340_PI419771968  | 13.09967 | 12.93693 | 11.13606 | 10.84748 | 0.014976 | 2.026532 | NA            | AK028812 | Sense      | Adamts12      |
| CUST_13098_PI419771968 | 12.0656  | 11.87417 | 10.03094 | 9.877609 | 0.004484 | 2.015612 | NA            | AY039009 | Sense      | Zeb2          |
| CUST_12355_PI419771968 | 12.24533 | 11.8896  | 10.22141 | 9.884604 | 0.014592 | 2.014457 | NA            | AK085840 | Sense      | Lhfp          |

|                        |          |          |          |          |          |          |          |           |            |               |
|------------------------|----------|----------|----------|----------|----------|----------|----------|-----------|------------|---------------|
| CUST_10810_PI419771968 | 8.232433 | 8.2445   | 6.296862 | 6.161906 | 0.020391 | 2.009083 | NA       | AK045346  | Sense      | Plod2         |
| CUST_1601_PI419771968  | 8.421913 | 8.735368 | 6.706991 | 6.45385  | 0.011537 | 1.99822  | NA       | AK172317  | Sense      | 4933407C03Rik |
| CUST_3813_PI419771968  | 8.417148 | 8.526662 | 6.672319 | 6.31878  | 0.039704 | 1.976356 | AK006637 | uc008dqd  | Antisense  | Cyp1b1        |
| CUST_10182_PI419771968 | 10.88409 | 10.72819 | 9.038426 | 8.622428 | 0.042031 | 1.975713 | NA       | AK038070  | Sense      | Hivep3        |
| CUST_9260_PI419771968  | 7.197065 | 7.161802 | 5.073472 | 5.338131 | 0.039357 | 1.973632 | NA       | AK021240  | Sense      | Greb11        |
| CUST_11631_PI419771968 | 10.47987 | 10.38742 | 8.472204 | 8.472233 | 0.015001 | 1.961426 | NA       | AK054342  | Sense      | Lhfp12        |
| CUST_12678_PI419771968 | 11.43352 | 11.7985  | 9.631416 | 9.726647 | 0.046488 | 1.936977 | NA       | AK133634  | Sense      | Tram2         |
| CUST_9149_PI419771968  | 7.251189 | 7.548305 | 5.628564 | 5.328649 | 0.011861 | 1.921141 | NA       | AK020866  | Intergenic | NA            |
| CUST_12920_PI419771968 | 12.00903 | 11.77669 | 10.06044 | 9.901515 | 0.008561 | 1.911881 | NA       | AK158356  | Sense      | Zeb2          |
| CUST_8903_PI419771968  | 7.610513 | 7.862996 | 6.091981 | 5.565556 | 0.048554 | 1.907986 | NA       | AK020075  | Sense      | Grk5          |
| CUST_10102_PI419771968 | 8.349133 | 8.089117 | 6.283845 | 6.36089  | 0.02994  | 1.896758 | NA       | AK037318  | Sense      | Eif4e3        |
| CUST_1379_PI419771968  | 15.204   | 15.32036 | 13.37397 | 13.37444 | 0.01961  | 1.887976 | NA       | AK149239  | Sense      | Dpysl3        |
| CUST_1016_PI419771968  | 10.39557 | 9.973862 | 8.054598 | 8.540878 | 0.029185 | 1.886977 | NA       | AK080649  | Intergenic | NA            |
| CUST_9110_PI419771968  | 10.71476 | 10.57812 | 8.831577 | 8.687364 | 0.002797 | 1.886968 | NA       | AK020712  | Sense      | Spats21       |
| CUST_12241_PI419771968 | 10.76123 | 10.58119 | 8.809562 | 8.759673 | 0.020649 | 1.886593 | NA       | AK084442  | Sense      | Foxp1         |
| CUST_587_PI419771968   | 13.32023 | 13.32467 | 11.53677 | 11.34101 | 0.032967 | 1.883558 | NA       | AK031998  | Sense      | Scrn1         |
| CUST_13475_PI419771968 | 11.25575 | 11.30154 | 9.394946 | 9.423522 | 0.000676 | 1.869411 | H19      | NR_001592 | Intergenic | NA            |
| CUST_5516_PI419771968  | 9.164212 | 8.808272 | 6.940833 | 7.309498 | 0.018494 | 1.861077 | AK047163 | uc009bma  | Antisense  | Dennd2a       |
| CUST_8904_PI419771968  | 9.179685 | 9.298352 | 7.287408 | 7.478613 | 0.007569 | 1.856008 | NA       | AK020076  | Sense      | Nrip1         |
| CUST_12374_PI419771968 | 8.237918 | 8.452827 | 6.663204 | 6.316588 | 0.020313 | 1.855477 | NA       | AK086137  | Sense      | 4933407C03Rik |
| CUST_8886_PI419771968  | 10.81276 | 10.40314 | 8.648559 | 8.876313 | 0.030387 | 1.845514 | NA       | AK019982  | Sense      | Tanc2         |
| CUST_10424_PI419771968 | 8.265396 | 8.385642 | 6.694033 | 6.310753 | 0.047666 | 1.823126 | NA       | AK040785  | Antisense  | Ly96          |
| CUST_9902_PI419771968  | 8.590548 | 8.265377 | 6.573745 | 6.714886 | 0.030296 | 1.783647 | NA       | AK035284  | Sense      | Foxp1         |
| CUST_6800_PI419771968  | 11.84734 | 11.73158 | 10.01583 | 10.0264  | 0.019824 | 1.768342 | Sat1     | uc009urr  | Sense      | Sat1          |
| CUST_8908_PI419771968  | 7.830511 | 7.498735 | 5.7447   | 6.070334 | 0.01707  | 1.757106 | NA       | AK020094  | Sense      | Plekhg3       |
| CUST_11569_PI419771968 | 8.771661 | 8.58195  | 6.957395 | 6.908689 | 0.025235 | 1.743764 | NA       | AK053547  | Sense      | Map2k6        |
| CUST_8923_PI419771968  | 7.317548 | 7.200697 | 5.581557 | 5.453367 | 0.002571 | 1.741661 | NA       | AK020138  | Sense      | 6720463M24Rik |
| CUST_12196_PI419771968 | 7.912072 | 7.736775 | 6.142276 | 6.023972 | 0.006287 | 1.7413   | NA       | AK083891  | Sense      | Ern1          |
| CUST_2210_PI419771968  | 6.186753 | 6.530843 | 4.697191 | 4.581876 | 0.043006 | 1.719265 | AK087392 | uc007ief  | Intergenic | NA            |
| CUST_13536_PI419771968 | 13.21399 | 13.1725  | 11.59648 | 11.40104 | 0.029642 | 1.694487 | Pisd-ps1 | NR_003517 | Antisense  | Sfi1          |
| CUST_10690_PI419771968 | 8.354147 | 8.287149 | 6.62137  | 6.667021 | 0.001217 | 1.676453 | NA       | AK044029  | Antisense  | Chadl         |

|                        |          |          |          |          |          |          |              |           |            |               |
|------------------------|----------|----------|----------|----------|----------|----------|--------------|-----------|------------|---------------|
| CUST_9328_PI419771968  | 10.10897 | 10.26736 | 8.705442 | 8.331214 | 0.040975 | 1.669834 | NA           | AK028519  | Sense      | 10-Sep        |
| CUST_11970_PI419771968 | 6.243261 | 6.708535 | 4.986406 | 4.626539 | 0.034004 | 1.669426 | NA           | AK081389  | Intergenic | NA            |
| CUST_6439_PI419771968  | 11.44489 | 10.95048 | 9.277193 | 9.781371 | 0.042014 | 1.668405 | AK011865     | uc009pak  | Sense      | 2610203C20Rik |
| CUST_5168_PI419771968  | 7.598713 | 7.545215 | 6.034674 | 5.77683  | 0.041124 | 1.666212 | AK012891     | uc008wse  | Antisense  | Smardc3       |
| CUST_10343_PI419771968 | 8.202883 | 8.328236 | 6.44802  | 6.768742 | 0.036402 | 1.657179 | NA           | AK039696  | Sense      | St6gal1       |
| CUST_11400_PI419771968 | 8.249525 | 8.343602 | 6.738688 | 6.546036 | 0.013861 | 1.654202 | NA           | AK052106  | Sense      | Pbx1          |
| CUST_7503_PI419771968  | 8.842567 | 9.012122 | 7.331146 | 7.255072 | 0.013425 | 1.634236 | NA           | AK013025  | Sense      | Fam115a       |
| CUST_8388_PI419771968  | 11.30277 | 11.25237 | 9.779413 | 9.519427 | 0.043482 | 1.628149 | NA           | AK017285  | Sense      | Cln5          |
| CUST_12297_PI419771968 | 11.14113 | 10.97488 | 9.494727 | 9.374943 | 0.005854 | 1.623166 | NA           | AK085124  | Sense      | Myo1d         |
| CUST_4531_PI419771968  | 7.953968 | 8.12483  | 6.299384 | 6.540267 | 0.011676 | 1.619574 | AK077405     | uc008nzz  | Antisense  | Ube2v1        |
| CUST_3535_PI419771968  | 8.835628 | 8.465323 | 6.940088 | 7.155253 | 0.030816 | 1.602806 | AK028852     | uc007znc  | Sense      | Tbc1d23       |
| CUST_7625_PI419771968  | 8.605184 | 8.558467 | 7.002679 | 6.958291 | 0.000412 | 1.601341 | NA           | AK013908  | Intergenic | NA            |
| CUST_4893_PI419771968  | 8.461783 | 8.587887 | 7.040975 | 6.84905  | 0.009089 | 1.579823 | AK172190     | uc008sru  | Sense      | Rnf38         |
| CUST_2281_PI419771968  | 13.21568 | 13.19948 | 11.76377 | 11.5199  | 0.048563 | 1.565745 | AK157519     | uc007jjl  | Intergenic | NA            |
| CUST_9479_PI419771968  | 13.58468 | 13.36624 | 11.8064  | 12.02406 | 0.009626 | 1.56023  | NA           | AK031010  | Antisense  | 4933403F05Rik |
| CUST_2056_PI419771968  | 13.91145 | 13.68442 | 12.26835 | 12.23675 | 0.042945 | 1.545384 | AK200837     | uc007ghs  | Sense      | F630110N24Rik |
| CUST_11579_PI419771968 | 6.548323 | 6.556582 | 4.956793 | 5.060677 | 0.020631 | 1.543718 | NA           | AK053637  | Intergenic | NA            |
| CUST_8669_PI419771968  | 9.141201 | 9.06424  | 7.578083 | 7.559961 | 0.011229 | 1.533698 | NA           | AK018479  | Sense      | Bod11         |
| CUST_8450_PI419771968  | 13.9244  | 13.8613  | 12.40952 | 12.31057 | 0.003268 | 1.532803 | NA           | AK017619  | Sense      | Dab2          |
| CUST_13696_PI419771968 | 6.616962 | 6.87782  | 5.069108 | 5.364958 | 0.016934 | 1.530358 | LOC100270707 | NR_026741 | Intergenic | NA            |
| CUST_12074_PI419771968 | 6.728229 | 6.884006 | 5.36325  | 5.197047 | 0.005615 | 1.525969 | NA           | AK082465  | Intergenic | NA            |
| CUST_11757_PI419771968 | 10.55673 | 10.47869 | 9.015701 | 8.990748 | 0.008734 | 1.514481 | NA           | AK078202  | Sense      | Fchs2         |
| CUST_9935_PI419771968  | 10.17689 | 9.942833 | 8.584631 | 8.535407 | 0.041303 | 1.499844 | NA           | AK035600  | Sense      | Calu          |
| CUST_6636_PI419771968  | 7.887715 | 8.010697 | 6.537856 | 6.368151 | 0.006986 | 1.496203 | AK086087     | uc009rze  | Antisense  | Rbms3         |
| CUST_9219_PI419771968  | 11.94697 | 11.72678 | 10.4022  | 10.3033  | 0.021968 | 1.484122 | NA           | AK021072  | Sense      | Myo1d         |
| CUST_8466_PI419771968  | 7.018642 | 6.866139 | 5.445799 | 5.502995 | 0.017147 | 1.467993 | NA           | AK017752  | Sense      | Nr6a1         |
| CUST_3_PI419771968     | 12.97807 | 12.856   | 11.4909  | 11.40826 | 0.004479 | 1.467456 | NA           | AK002304  | Intergenic | NA            |
| CUST_11805_PI419771968 | 9.195639 | 9.003843 | 7.658459 | 7.63928  | 0.040155 | 1.450872 | NA           | AK078845  | Sense      | Ube2e3        |
| CUST_9720_PI419771968  | 11.7336  | 11.94127 | 10.57813 | 10.23107 | 0.032211 | 1.43284  | NA           | AK033584  | Sense      | Hivep2        |
| CUST_2554_PI419771968  | 7.130738 | 6.781587 | 5.400654 | 5.690153 | 0.026986 | 1.410759 | AK133650     | uc007ndz  | Intergenic | NA            |
| CUST_11927_PI419771968 | 10.06263 | 10.10218 | 8.774616 | 8.593546 | 0.033229 | 1.398327 | NA           | AK080924  | Sense      | Snx10         |

|                        |          |          |          |          |          |          |               |           |            |               |
|------------------------|----------|----------|----------|----------|----------|----------|---------------|-----------|------------|---------------|
| CUST_12717_PI419771968 | 8.738371 | 8.653303 | 7.3278   | 7.269641 | 0.002538 | 1.397117 | NA            | AK136865  | Sense      | 1110003E01Rik |
| CUST_10207_PI419771968 | 10.1413  | 9.893524 | 8.756625 | 8.499561 | 0.016175 | 1.389317 | NA            | AK038224  | Intergenic | NA            |
| CUST_10576_PI419771968 | 8.527037 | 8.643803 | 7.248537 | 7.15019  | 0.003428 | 1.386057 | NA            | AK042823  | Sense      | Zfpm2         |
| CUST_13487_PI419771968 | 15.61774 | 15.67082 | 14.30887 | 14.21673 | 0.004334 | 1.381483 | Gas5          | NR_002840 | Intergenic | NA            |
| CUST_11282_PI419771968 | 6.674732 | 6.80452  | 5.50151  | 5.21977  | 0.033205 | 1.378986 | NA            | AK051030  | Sense      | Tax1bp1       |
| CUST_12631_PI419771968 | 7.227922 | 7.50187  | 6.200716 | 5.775181 | 0.044868 | 1.376948 | NA            | AK090243  | Sense      | Lman2l        |
| CUST_4974_PI419771968  | 9.810852 | 9.826187 | 8.459043 | 8.432375 | 0.000608 | 1.372811 | 2210012G02Rik | uc008tzi  | Sense      | 2210012G02Rik |
| CUST_2317_PI419771968  | 7.652344 | 7.415448 | 5.986886 | 6.372523 | 0.040745 | 1.354192 | AK039862      | uc007kcg  | Sense      | Pafah1b1      |
| CUST_9937_PI419771968  | 10.30595 | 10.6829  | 8.95985  | 9.325106 | 0.035752 | 1.351949 | NA            | AK035610  | Intergenic | NA            |
| CUST_1584_PI419771968  | 5.889178 | 5.735608 | 4.502136 | 4.430245 | 0.014367 | 1.346203 | NA            | AK170083  | Sense      | Acox3         |
| CUST_6297_PI419771968  | 9.812264 | 9.687542 | 8.53255  | 8.280045 | 0.027244 | 1.343606 | AK080383      | uc009ndl  | Antisense  | Ctcf          |
| CUST_6869_PI419771968  | 10.33394 | 10.44377 | 9.186918 | 8.915192 | 0.037568 | 1.337797 | NA            | AK003925  | Intergenic | NA            |
| CUST_2362_PI419771968  | 8.749777 | 8.533183 | 7.515946 | 7.121486 | 0.048218 | 1.322764 | AK011568      | uc007kry  | Antisense  | Bcas3         |
| CUST_3727_PI419771968  | 7.662371 | 7.426777 | 6.264238 | 6.188719 | 0.038744 | 1.318096 | AK140218      | uc008cad  | Antisense  | Zbtb22        |
| CUST_11029_PI419771968 | 10.04718 | 9.984481 | 8.77175  | 8.632165 | 0.01385  | 1.313871 | NA            | AK047823  | Sense      | Sap30bp       |
| CUST_12069_PI419771968 | 9.353048 | 9.199527 | 7.844719 | 8.08392  | 0.018709 | 1.311968 | NA            | AK082418  | Sense      | Mast4         |
| CUST_3387_PI419771968  | 6.247055 | 6.189544 | 5.003447 | 4.837125 | 0.02431  | 1.298014 | AK163711      | uc007xjz  | Intergenic | NA            |
| CUST_7575_PI419771968  | 9.964509 | 10.06368 | 8.83798  | 8.604056 | 0.03075  | 1.293079 | NA            | AK013635  | Sense      | Prkg1         |
| CUST_4431_PI419771968  | 8.385321 | 8.063993 | 7.103521 | 6.78962  | 0.029558 | 1.278086 | AK157218      | uc008mgp  | Intergenic | NA            |
| CUST_12519_PI419771968 | 8.878784 | 8.739309 | 7.56807  | 7.498512 | 0.012222 | 1.275756 | NA            | AK087847  | Sense      | Srp54c        |
| CUST_8625_PI419771968  | 8.716217 | 8.669227 | 7.333195 | 7.507724 | 0.031896 | 1.272263 | NA            | AK018273  | Sense      | Ubxn2b        |
| CUST_11428_PI419771968 | 11.17547 | 11.08586 | 9.937287 | 9.787828 | 0.010032 | 1.268105 | NA            | AK052455  | Sense      | Ddi2          |
| CUST_7719_PI419771968  | 9.71067  | 10.04906 | 8.795788 | 8.438527 | 0.036153 | 1.262706 | NA            | AK014710  | Sense      | Akap13        |
| CUST_10085_PI419771968 | 11.32599 | 11.27408 | 10.0818  | 10.01476 | 0.001585 | 1.251755 | NA            | AK037153  | Sense      | Ypel2         |
| CUST_8601_PI419771968  | 7.694602 | 7.516271 | 6.523434 | 6.2096   | 0.036408 | 1.23892  | NA            | AK018162  | Sense      | Cables1       |
| CUST_10223_PI419771968 | 7.075175 | 6.876693 | 5.862849 | 5.612488 | 0.018718 | 1.238266 | NA            | AK038358  | Antisense  | Dhx30         |
| CUST_9530_PI419771968  | 9.886454 | 9.939049 | 8.712882 | 8.654952 | 0.001065 | 1.228835 | NA            | AK031438  | Sense      | Cmtm4         |
| CUST_6899_PI419771968  | 11.74644 | 11.63236 | 10.521   | 10.4148  | 0.004133 | 1.221501 | NA            | AK005234  | Sense      | Rbm39         |
| CUST_9104_PI419771968  | 8.514076 | 8.426206 | 7.355299 | 7.14429  | 0.029511 | 1.220347 | NA            | AK020687  | Sense      | Rinl          |
| CUST_8919_PI419771968  | 9.050163 | 9.162387 | 7.879545 | 7.894626 | 0.026638 | 1.21919  | NA            | AK020122  | Sense      | Nbea          |
| CUST_2271_PI419771968  | 7.278092 | 7.361945 | 5.988542 | 6.234067 | 0.043195 | 1.208715 | AK030920      | uc007jeg  | Antisense  | Zkscan17      |

|                        |          |          |          |          |          |          |          |           |            |               |
|------------------------|----------|----------|----------|----------|----------|----------|----------|-----------|------------|---------------|
| CUST_13587_PI419771968 | 8.050871 | 8.196784 | 6.910063 | 6.921089 | 0.037372 | 1.208252 | Xist     | NR_001570 | Intergenic | NA            |
| CUST_5504_PI419771968  | 14.80724 | 14.88252 | 13.65515 | 13.63556 | 0.013418 | 1.199521 | Creb3l2  | uc009bje  | Sense      | Creb3l2       |
| CUST_13113_PI419771968 | 14.79781 | 14.83046 | 13.63366 | 13.62321 | 0.004101 | 1.185697 | NA       | BC006792  | Sense      | Creb3l2       |
| CUST_3684_PI419771968  | 10.26769 | 10.14798 | 9.143744 | 8.901217 | 0.030823 | 1.185355 | AK079380 | uc008bbb  | Intergenic | NA            |
| CUST_5948_PI419771968  | 10.04396 | 10.13309 | 9.020841 | 8.787705 | 0.037949 | 1.18425  | AK088822 | uc009idh  | Sense      | Eftud1        |
| CUST_5544_PI419771968  | 11.76169 | 11.78172 | 10.66404 | 10.51365 | 0.037253 | 1.182858 | AK129160 | uc009buo  | Intergenic | NA            |
| CUST_7666_PI419771968  | 10.47481 | 10.54812 | 9.372037 | 9.310297 | 0.001931 | 1.170297 | NA       | AK014176  | Sense      | Ano6          |
| CUST_6296_PI419771968  | 9.348063 | 9.454502 | 8.35851  | 8.10766  | 0.038618 | 1.168198 | AK086852 | uc009ndk  | Antisense  | Ctcf          |
| CUST_12073_PI419771968 | 6.379309 | 6.550046 | 5.468092 | 5.144308 | 0.045387 | 1.158478 | NA       | AK082454  | Antisense  | 6530409C15Rik |
| CUST_12321_PI419771968 | 5.263349 | 5.395817 | 4.173855 | 4.176525 | 0.036415 | 1.154393 | NA       | AK085434  | Sense      | Efna5         |
| CUST_4937_PI419771968  | 9.100419 | 9.002166 | 7.881438 | 7.934934 | 0.007266 | 1.143107 | AK029637 | uc008tld  | Sense      | 4930473A06Rik |
| CUST_2709_PI419771968  | 11.4081  | 11.6174  | 10.53278 | 10.21222 | 0.037978 | 1.140255 | V00821   | uc007pgs  | Antisense  | Gml1029       |
| CUST_4987_PI419771968  | 8.52519  | 8.757837 | 7.691102 | 7.322553 | 0.049323 | 1.134686 | AK048089 | uc008ued  | Intergenic | NA            |
| CUST_12736_PI419771968 | 6.99552  | 7.097289 | 5.998455 | 5.830631 | 0.014329 | 1.131862 | NA       | AK138072  | Intergenic | NA            |
| CUST_4498_PI419771968  | 11.77243 | 11.5795  | 10.57901 | 10.51001 | 0.033572 | 1.131453 | Caper    | uc008nmw  | Sense      | Rbm39         |
| CUST_1536_PI419771968  | 11.79739 | 11.89648 | 10.85693 | 10.59177 | 0.048683 | 1.122579 | NA       | AK162901  | Sense      | Ar            |
| CUST_8484_PI419771968  | 8.287104 | 7.970426 | 6.865303 | 7.1512   | 0.035146 | 1.120514 | NA       | AK017916  | Sense      | Fam188a       |
| CUST_12163_PI419771968 | 8.640406 | 8.375385 | 7.265111 | 7.525168 | 0.026747 | 1.112756 | NA       | AK083553  | Sense      | Bmpr2         |
| CUST_9657_PI419771968  | 9.916083 | 9.789511 | 8.878622 | 8.758232 | 0.007119 | 1.03437  | NA       | AK032935  | Sense      | Khdrbs1       |
| CUST_10755_PI419771968 | 8.761527 | 8.979748 | 7.937462 | 7.748269 | 0.020221 | 1.027772 | NA       | AK044830  | Sense      | Pou2f1        |
| CUST_6631_PI419771968  | 11.61239 | 11.43248 | 12.4603  | 12.58691 | 0.016476 | -1.00117 | AK180240 | uc009rxz  | Sense      | Dync1l1l      |
| CUST_10338_PI419771968 | 7.767477 | 7.768236 | 8.824569 | 8.716514 | 0.034261 | -1.00269 | NA       | AK039666  | Sense      | Pde4b         |
| CUST_12363_PI419771968 | 5.457063 | 5.290321 | 6.396065 | 6.360232 | 0.043826 | -1.00446 | NA       | AK085973  | Intergenic | NA            |
| CUST_1382_PI419771968  | 9.692492 | 9.580487 | 10.52348 | 10.75898 | 0.038918 | -1.00474 | NA       | AK149390  | Antisense  | Hectd2        |
| CUST_9437_PI419771968  | 4.994886 | 4.840533 | 6.041811 | 5.80377  | 0.028698 | -1.00508 | NA       | AK030301  | Intergenic | NA            |
| CUST_6336_PI419771968  | 5.681895 | 5.406355 | 6.691013 | 6.457125 | 0.031214 | -1.02994 | Mlycd    | uc009npo  | Antisense  | Mlycd         |
| CUST_1557_PI419771968  | 7.978007 | 8.040539 | 8.97802  | 9.105215 | 0.014882 | -1.03234 | NA       | AK165621  | Sense      | Tmem140       |
| CUST_5927_PI419771968  | 5.11368  | 5.171466 | 6.219857 | 6.133041 | 0.004699 | -1.03388 | AK043101 | uc009hgy  | Antisense  | Rgma          |
| CUST_498_PI421760821   | 7.846767 | 7.70778  | 8.685801 | 8.939883 | 0.036037 | -1.03557 | NA       | uc.18-    | Sense      | Eri3          |
| CUST_4947_PI419771968  | 7.870762 | 7.732262 | 8.797808 | 8.882797 | 0.011823 | -1.03879 | AK080222 | uc008trz  | Intergenic | NA            |
| CUST_9141_PI419771968  | 10.72567 | 10.39801 | 11.49306 | 11.73137 | 0.042469 | -1.05038 | NA       | AK020839  | Sense      | Gm9955        |



|                        |          |          |          |          |          |          |               |           |            |               |
|------------------------|----------|----------|----------|----------|----------|----------|---------------|-----------|------------|---------------|
| CUST_4767_PI419771968  | 5.943375 | 5.972746 | 7.047977 | 6.972555 | 0.010131 | -1.05221 | Ptbp2         | uc008rdm  | Sense      | Ptbp2         |
| CUST_1969_PI419771968  | 5.444157 | 5.312572 | 6.467344 | 6.44741  | 0.034834 | -1.07901 | AK006037      | uc007eyj  | Antisense  | Armc2         |
| CUST_7557_PI419771968  | 7.074213 | 7.313547 | 8.155024 | 8.393233 | 0.023569 | -1.08025 | NA            | AK013555  | Intergenic | NA            |
| CUST_13693_PI419771968 | 7.487984 | 7.685805 | 8.570955 | 8.784415 | 0.017614 | -1.09079 | Vax2os2       | NR_002871 | Antisense  | Vax2          |
| CUST_9036_PI419771968  | 6.082359 | 5.883157 | 7.123452 | 7.03527  | 0.029504 | -1.0966  | NA            | AK020501  | Sense      | Fgf13         |
| CUST_4698_PI419771968  | 8.149864 | 8.091274 | 9.329446 | 9.119847 | 0.045264 | -1.10408 | AK161599      | uc008pze  | Antisense  | Zbtb7b        |
| CUST_2763_PI419771968  | 7.97777  | 7.958715 | 9.030662 | 9.166678 | 0.034884 | -1.13043 | AK020728      | uc007pyl  | Intergenic | NA            |
| CUST_4137_PI419771968  | 6.059636 | 6.435694 | 7.535807 | 7.226406 | 0.046272 | -1.13344 | AK040197      | uc008hrl  | Antisense  | Mgea5         |
| CUST_6483_PI419771968  | 8.454265 | 8.49747  | 9.521288 | 9.714966 | 0.044234 | -1.14226 | Nrg4          | uc009psh  | Sense      | Nrg4          |
| CUST_6858_PI419771968  | 4.879615 | 5.174294 | 6.319921 | 6.037432 | 0.03012  | -1.15172 | NA            | AK003532  | Intergenic | NA            |
| CUST_3615_PI419771968  | 7.456251 | 7.693717 | 8.64119  | 8.860694 | 0.018694 | -1.17596 | AK015782      | uc008aet  | Intergenic | NA            |
| CUST_5023_PI419771968  | 6.898155 | 7.047359 | 8.251934 | 8.048452 | 0.014778 | -1.17744 | AK019643      | uc008uuw  | Intergenic | NA            |
| CUST_4699_PI419771968  | 7.032501 | 6.893016 | 8.197029 | 8.106318 | 0.008702 | -1.18891 | AK136654      | uc008pzf  | Antisense  | Zbtb7b        |
| CUST_1222_PI419771968  | 7.442681 | 7.119411 | 8.384183 | 8.567208 | 0.040455 | -1.19465 | NA            | AK131699  | Antisense  | Gm20547       |
| CUST_7572_PI419771968  | 5.863136 | 5.624995 | 7.093491 | 6.791269 | 0.028204 | -1.19831 | NA            | AK013618  | Sense      | Gpc5          |
| CUST_690_PI419771968   | 5.758051 | 5.664056 | 6.964487 | 6.864718 | 0.003278 | -1.20355 | NA            | AK040157  | Sense      | Ccdc148       |
| CUST_3827_PI419771968  | 8.573126 | 8.833805 | 10.08684 | 9.732317 | 0.038093 | -1.20611 | AK011222      | uc008dte  | Antisense  | Ppm1b         |
| CUST_384_PI419771968   | 10.85952 | 10.979   | 12.04107 | 12.22004 | 0.012443 | -1.2113  | NA            | AK015268  | Sense      | Pde7a         |
| CUST_2758_PI419771968  | 11.26339 | 11.32616 | 12.50559 | 12.51225 | 0.015309 | -1.21415 | AK020095      | uc007pwt  | Antisense  | Gpld1         |
| CUST_1659_PI419771968  | 6.284435 | 6.305886 | 7.417718 | 7.61236  | 0.048187 | -1.21988 | AK217058      | uc007ayq  | Sense      | 1700019D03Rik |
| CUST_9836_PI419771968  | 11.43408 | 11.36469 | 12.60609 | 12.66831 | 0.001504 | -1.23781 | NA            | AK034695  | Sense      | Cul3          |
| CUST_5631_PI419771968  | 4.755389 | 4.742225 | 5.994827 | 6.007849 | 5.47E-05 | -1.25253 | AK029023      | uc009cvm  | Antisense  | Mgll          |
| CUST_6974_PI419771968  | 6.935029 | 6.519393 | 7.818452 | 8.163363 | 0.045575 | -1.2637  | NA            | AK006015  | Intergenic | NA            |
| CUST_2613_PI419771968  | 5.838988 | 5.889002 | 7.04854  | 7.214922 | 0.028155 | -1.26774 | AK048798      | uc007nws  | Antisense  | Hif1a         |
| CUST_4244_PI419771968  | 7.308841 | 7.483997 | 8.690666 | 8.646825 | 0.033358 | -1.27233 | 2610205E22Rik | uc008jcu  | Sense      | Mettl11a      |
| CUST_12954_PI419771968 | 9.083653 | 9.410965 | 10.70249 | 10.34911 | 0.034124 | -1.27849 | NA            | AK162589  | Sense      | Slc25a12      |
| CUST_4763_PI419771968  | 9.247858 | 9.259761 | 10.59462 | 10.4785  | 0.027239 | -1.28275 | AK020812      | uc008rbq  | Sense      | A930005H10Rik |
| CUST_12457_PI419771968 | 5.523869 | 5.27281  | 6.818472 | 6.544531 | 0.020733 | -1.28316 | NA            | AK087003  | Sense      | Irgb6         |
| CUST_4545_PI419771968  | 6.60162  | 6.516283 | 7.745953 | 7.948979 | 0.025815 | -1.28851 | AK133337      | uc008ocj  | Intergenic | NA            |
| CUST_13398_PI419771968 | 7.092559 | 7.163844 | 8.36925  | 8.515129 | 0.012921 | -1.31399 | NA            | U80892    | Sense      | Nr6a1         |
| CUST_2163_PI419771968  | 8.88292  | 9.168165 | 10.55517 | 10.12708 | 0.047765 | -1.31558 | AK040027      | uc007hnf  | Intergenic | NA            |

|                        |          |          |          |          |          |          |          |           |            |               |
|------------------------|----------|----------|----------|----------|----------|----------|----------|-----------|------------|---------------|
| CUST_11923_PI419771968 | 7.599043 | 7.64366  | 9.029253 | 8.85636  | 0.030983 | -1.32146 | NA       | AK080872  | Sense      | Lpl           |
| CUST_5874_PI419771968  | 5.080929 | 5.309145 | 6.656504 | 6.399345 | 0.016888 | -1.33289 | AB013468 | uc009gxh  | Sense      | Cyth2         |
| CUST_331_PI419771968   | 12.2499  | 12.56637 | 13.97119 | 13.52386 | 0.04835  | -1.33939 | NA       | AK013363  | Antisense  | Slc3a1        |
| CUST_9584_PI419771968  | 8.232829 | 8.220497 | 9.614245 | 9.542465 | 0.01403  | -1.35169 | NA       | AK032188  | Antisense  | Psd2          |
| CUST_12485_PI419771968 | 4.05713  | 4.295508 | 5.71417  | 5.342735 | 0.037053 | -1.35213 | NA       | AK087306  | Intergenic | NA            |
| CUST_8609_PI419771968  | 6.085656 | 5.813448 | 7.472754 | 7.134977 | 0.027479 | -1.35431 | NA       | AK018204  | Sense      | Kcnd2         |
| CUST_2090_PI419771968  | 9.498427 | 9.496484 | 10.82302 | 10.89893 | 0.017644 | -1.36352 | AK043075 | uc007guo  | Intergenic | NA            |
| CUST_6859_PI419771968  | 5.341154 | 5.0276   | 6.42057  | 6.693164 | 0.023251 | -1.37249 | NA       | AK003662  | Intergenic | NA            |
| CUST_7782_PI419771968  | 8.131332 | 8.48713  | 9.821218 | 9.552543 | 0.029913 | -1.37765 | NA       | AK015042  | Intergenic | NA            |
| CUST_1507_PI419771968  | 6.794707 | 7.080521 | 8.26394  | 8.376631 | 0.039312 | -1.38267 | NA       | AK158852  | Intergenic | NA            |
| CUST_3629_PI419771968  | 4.858678 | 4.454667 | 5.939932 | 6.174281 | 0.043694 | -1.40043 | Gm1604   | uc008aig  | Sense      | Gm1604b       |
| CUST_11484_PI419771968 | 6.232878 | 6.544184 | 7.894856 | 7.691397 | 0.025479 | -1.4046  | NA       | AK052921  | Intergenic | NA            |
| CUST_12807_PI419771968 | 8.985317 | 8.823867 | 10.27344 | 10.36079 | 0.01139  | -1.41253 | NA       | AK142265  | Intergenic | NA            |
| CUST_3507_PI419771968  | 7.177481 | 7.263392 | 8.608763 | 8.673885 | 0.002057 | -1.42089 | AK083150 | uc007z fz | Antisense  | Zbtb20        |
| CUST_6257_PI419771968  | 10.77042 | 10.81974 | 12.17448 | 12.33001 | 0.021096 | -1.45717 | AK085761 | uc009mqg  | Antisense  | Itfg1         |
| CUST_5489_PI419771968  | 10.23605 | 10.33195 | 11.87096 | 11.61344 | 0.033849 | -1.4582  | BC021953 | uc009bfz  | Intergenic | NA            |
| CUST_3431_PI419771968  | 8.525332 | 8.330298 | 9.707749 | 10.08077 | 0.039817 | -1.46644 | AK013883 | uc007ydb  | Sense      | 1810013L24Rik |
| CUST_11483_PI419771968 | 12.96407 | 13.19336 | 14.50534 | 14.59042 | 0.029055 | -1.46916 | NA       | AK052919  | Sense      | Trdn          |
| CUST_4115_PI419771968  | 6.48911  | 6.696285 | 8.199094 | 7.928571 | 0.016001 | -1.47114 | AK087295 | uc008hlw  | Sense      | Pik3ap1       |
| CUST_9425_PI419771968  | 8.874838 | 9.258336 | 10.65941 | 10.41704 | 0.034421 | -1.47164 | NA       | AK030094  | Antisense  | Pcdh7         |
| CUST_9051_PI419771968  | 5.082318 | 5.38398  | 6.631175 | 6.785466 | 0.029563 | -1.47517 | NA       | AK020529  | Sense      | Lrba          |
| CUST_2949_PI419771968  | 8.475695 | 8.326132 | 9.716024 | 10.04135 | 0.036905 | -1.47777 | BC096416 | uc007sar  | Sense      | D830030K20Rik |
| CUST_10802_PI419771968 | 5.213378 | 4.807911 | 6.268041 | 6.743082 | 0.042966 | -1.49492 | NA       | AK045293  | Sense      | Erbp4         |
| CUST_10814_PI419771968 | 6.84975  | 6.603746 | 8.291163 | 8.178074 | 0.024339 | -1.50787 | NA       | AK045418  | Sense      | Phf14         |
| CUST_7669_PI419771968  | 6.707889 | 7.072233 | 8.316463 | 8.511227 | 0.035503 | -1.52378 | NA       | AK014217  | Antisense  | 1110001J03Rik |
| CUST_12043_PI419771968 | 8.892214 | 9.16918  | 10.63765 | 10.51168 | 0.028125 | -1.54397 | NA       | AK082229  | Sense      | Srpk1         |
| CUST_7579_PI419771968  | 4.705648 | 4.360875 | 5.89756  | 6.291967 | 0.028146 | -1.5615  | NA       | AK013657  | Sense      | Kcnp1         |
| CUST_6250_PI419771968  | 8.39649  | 8.652998 | 10.15499 | 10.04519 | 0.026424 | -1.57535 | Dnase2a  | uc009mob  | Antisense  | Mast1         |
| CUST_10891_PI419771968 | 6.984721 | 6.659277 | 8.523796 | 8.272136 | 0.019693 | -1.57597 | NA       | AK046572  | Intergenic | NA            |
| CUST_2159_PI419771968  | 7.832741 | 7.931625 | 9.559775 | 9.397037 | 0.007731 | -1.59622 | AK005897 | uc007hkd  | Sense      | Tmem194       |
| CUST_1561_PI419771968  | 12.06245 | 12.2033  | 13.84633 | 13.61288 | 0.014109 | -1.59673 | NA       | AK165789  | Antisense  | Chrm2         |

|                        |          |          |          |          |          |          |               |           |            |               |
|------------------------|----------|----------|----------|----------|----------|----------|---------------|-----------|------------|---------------|
| CUST_11175_PI419771968 | 6.08238  | 6.469428 | 7.792781 | 7.982059 | 0.039174 | -1.61152 | NA            | AK049060  | Intergenic | NA            |
| CUST_2192_PI419771968  | 11.14976 | 11.02139 | 12.73601 | 12.68232 | 0.010345 | -1.62359 | AK132798      | uc007hzc  | Antisense  | Ramp3         |
| CUST_176_PI419771968   | 7.904577 | 8.152061 | 9.652541 | 9.719198 | 0.03512  | -1.65755 | NA            | AK008149  | Sense      | Acadm         |
| CUST_3642_PI419771968  | 4.964115 | 4.494704 | 6.256717 | 6.521236 | 0.04349  | -1.65957 | AK029100      | uc008akr  | Intergenic | NA            |
| CUST_9919_PI419771968  | 8.303838 | 8.573298 | 10.078   | 10.12005 | 0.046648 | -1.66046 | NA            | AK035420  | Intergenic | NA            |
| CUST_9274_PI419771968  | 8.41072  | 8.806893 | 10.42926 | 10.11138 | 0.025312 | -1.66152 | NA            | AK021294  | Intergenic | NA            |
| CUST_5685_PI419771968  | 5.310216 | 5.150031 | 6.854528 | 6.97311  | 0.004927 | -1.6837  | AK137536      | uc009dnn  | Sense      | Cecr2         |
| CUST_3430_PI419771968  | 6.035742 | 6.39141  | 8.088855 | 7.706271 | 0.023529 | -1.68399 | AK154225      | uc007ybf  | Sense      | 4930451G09Rik |
| CUST_7139_PI419771968  | 6.648288 | 6.990353 | 8.61479  | 8.43525  | 0.02786  | -1.7057  | NA            | AK006956  | Intergenic | NA            |
| CUST_13146_PI419771968 | 8.094562 | 8.315341 | 10.09758 | 9.744802 | 0.023522 | -1.71624 | NA            | BC024137  | Intergenic | NA            |
| CUST_226_PI419771968   | 6.772368 | 6.82959  | 8.591175 | 8.445971 | 0.012339 | -1.71759 | NA            | AK009611  | Antisense  | Tmem180       |
| CUST_3643_PI419771968  | 6.225318 | 6.104014 | 7.915885 | 7.876288 | 0.012352 | -1.73142 | AK021075      | uc008akv  | Antisense  | Slc22a3       |
| CUST_5085_PI419771968  | 6.398611 | 6.75227  | 8.485382 | 8.163811 | 0.018611 | -1.74916 | AK035687      | uc008vvo  | Antisense  | Pex14         |
| CUST_247_PI419771968   | 4.850645 | 4.687945 | 6.534897 | 6.540601 | 0.029075 | -1.76845 | NA            | AK010374  | Sense      | Ttl           |
| CUST_13754_PI419771968 | 5.563372 | 5.298988 | 7.31083  | 7.106334 | 0.010735 | -1.7774  | 4932435O22Rik | NR_027643 | Intergenic | NA            |
| CUST_7327_PI419771968  | 6.218275 | 5.676738 | 7.459818 | 7.998599 | 0.043015 | -1.7817  | NA            | AK009503  | Antisense  | Pla2g6        |
| CUST_11671_PI419771968 | 8.503444 | 8.766379 | 10.61001 | 10.23356 | 0.021946 | -1.78688 | NA            | AK076489  | Antisense  | Itsn2         |
| CUST_6337_PI419771968  | 6.981634 | 7.186537 | 9.082824 | 8.684256 | 0.033053 | -1.79945 | AK085792      | uc009nqc  | Antisense  | Wfdc1         |
| CUST_10618_PI419771968 | 11.20064 | 11.40029 | 13.01161 | 13.19444 | 0.00576  | -1.80256 | NA            | AK043387  | Sense      | Sorbs1        |
| CUST_5185_PI419771968  | 7.22279  | 7.091528 | 9.085994 | 8.845395 | 0.014184 | -1.80854 | AK035982      | uc008wvq  | Antisense  | Kcnk3         |
| CUST_8780_PI419771968  | 6.374944 | 6.278246 | 8.119629 | 8.186219 | 0.001951 | -1.82633 | NA            | AK019580  | Intergenic | NA            |
| CUST_7329_PI419771968  | 8.466064 | 8.305339 | 10.17443 | 10.33644 | 0.003705 | -1.86974 | NA            | AK009508  | Sense      | Adk           |
| CUST_2586_PI419771968  | 7.427318 | 7.686627 | 9.518565 | 9.338318 | 0.010551 | -1.87147 | AK006973      | uc007nny  | Intergenic | NA            |
| CUST_5470_PI419771968  | 6.199523 | 6.49361  | 8.143072 | 8.297301 | 0.019334 | -1.87362 | BC062820      | uc009axr  | Antisense  | Gm16039       |
| CUST_2132_PI419771968  | 5.6195   | 5.768864 | 7.628678 | 7.50887  | 0.003207 | -1.87459 | AK145303      | uc007hcg  | Intergenic | NA            |
| CUST_8410_PI419771968  | 5.984229 | 6.178464 | 8.134996 | 7.782339 | 0.023783 | -1.87732 | NA            | AK017413  | Intergenic | NA            |
| CUST_811_PI419771968   | 7.594555 | 7.873724 | 9.521899 | 9.739715 | 0.010458 | -1.89667 | NA            | AK048740  | Intergenic | NA            |
| CUST_3965_PI419771968  | 4.034646 | 3.903998 | 5.77374  | 5.962822 | 0.005933 | -1.89896 | BC028804      | uc008fma  | Intergenic | NA            |
| CUST_2053_PI419771968  | 5.822782 | 6.449909 | 8.282034 | 7.795643 | 0.045898 | -1.90249 | AK009897      | uc007ggl  | Antisense  | Itgb1bp3      |
| CUST_784_PI419771968   | 10.48064 | 10.32126 | 12.20129 | 12.42474 | 0.007532 | -1.91206 | NA            | AK046873  | Sense      | Cdc3711       |
| CUST_13315_PI419771968 | 11.99981 | 11.81889 | 13.67718 | 13.97766 | 0.015833 | -1.91808 | NA            | BC094579  | Intergenic | NA            |

|                        |          |          |          |          |          |          |          |          |            |               |
|------------------------|----------|----------|----------|----------|----------|----------|----------|----------|------------|---------------|
| CUST_9449_PI419771968  | 8.398626 | 8.760171 | 10.26678 | 10.75635 | 0.029228 | -1.93217 | NA       | AK030451 | Sense      | Rbm6          |
| CUST_1322_PI419771968  | 5.361116 | 5.442764 | 7.330243 | 7.347566 | 0.009911 | -1.93696 | NA       | AK141772 | Antisense  | Idh3b         |
| CUST_6242_PI419771968  | 6.190169 | 6.382744 | 8.163077 | 8.312403 | 0.00498  | -1.95128 | AK157878 | uc009mlj | Sense      | Gm10644       |
| CUST_13207_PI419771968 | 6.18804  | 6.43658  | 8.49913  | 8.048173 | 0.032386 | -1.96134 | NA       | BC039959 | Intergenic | NA            |
| CUST_4957_PI419771968  | 4.501895 | 4.776134 | 6.726459 | 6.479204 | 0.009046 | -1.96382 | AK002663 | uc008ttz | Intergenic | NA            |
| CUST_3565_PI419771968  | 8.067867 | 8.313648 | 10.35566 | 9.95925  | 0.023017 | -1.9667  | AK087725 | uc007zsl | Intergenic | NA            |
| CUST_3107_PI419771968  | 3.977867 | 3.71987  | 5.60855  | 6.059699 | 0.030551 | -1.98526 | Mipep    | uc007ufh | Sense      | Mipep         |
| CUST_10439_PI419771968 | 8.838531 | 9.12033  | 10.89019 | 11.0502  | 0.014681 | -1.99077 | NA       | AK041002 | Antisense  | Tubb6         |
| CUST_3986_PI419771968  | 5.519095 | 5.685783 | 7.607938 | 7.603979 | 0.026386 | -2.00352 | AK172459 | uc008frx | Antisense  | Pstpip2       |
| CUST_1218_PI419771968  | 4.756003 | 4.207123 | 6.724945 | 6.286868 | 0.032099 | -2.02434 | NA       | AK131677 | Antisense  | Gmn           |
| CUST_174_PI419771968   | 7.22125  | 7.446029 | 9.453965 | 9.30634  | 0.007649 | -2.04651 | NA       | AK008051 | Intergenic | NA            |
| CUST_1761_PI419771968  | 7.958485 | 8.150694 | 10.30807 | 9.89831  | 0.031605 | -2.0486  | AK013506 | uc007ckw | Antisense  | Acmsd         |
| CUST_668_PI419771968   | 10.47205 | 10.96308 | 13.05289 | 12.501   | 0.031625 | -2.05939 | NA       | AK038898 | Intergenic | NA            |
| CUST_213_PI419771968   | 8.375289 | 8.683527 | 10.82035 | 10.38214 | 0.021964 | -2.07184 | NA       | AK009290 | Antisense  | D17H6S53E     |
| CUST_11222_PI419771968 | 5.454233 | 5.430832 | 7.626699 | 7.406719 | 0.031883 | -2.07418 | NA       | AK049981 | Sense      | Clstn2        |
| CUST_5432_PI419771968  | 8.075968 | 8.455598 | 10.29515 | 10.42487 | 0.037582 | -2.09423 | AK009603 | uc009akc | Intergenic | NA            |
| CUST_7282_PI419771968  | 6.527611 | 6.5578   | 8.781361 | 8.506234 | 0.039404 | -2.10109 | NA       | AK008862 | Intergenic | NA            |
| CUST_8112_PI419771968  | 6.071375 | 6.597755 | 8.624283 | 8.31398  | 0.033645 | -2.13457 | NA       | AK016112 | Intergenic | NA            |
| CUST_1699_PI419771968  | 3.89883  | 4.157677 | 6.093739 | 6.236932 | 0.011998 | -2.13708 | AK048274 | uc007bky | Intergenic | NA            |
| CUST_7318_PI419771968  | 9.302053 | 9.856537 | 12.08373 | 11.38907 | 0.043861 | -2.15711 | NA       | AK009349 | Intergenic | NA            |
| CUST_4296_PI419771968  | 9.440764 | 9.984876 | 12.06472 | 11.67802 | 0.029643 | -2.15855 | AK007819 | uc008jwi | Antisense  | Cobll1        |
| CUST_10822_PI419771968 | 6.803705 | 6.900685 | 9.057057 | 9.069108 | 0.012584 | -2.21089 | NA       | AK045559 | Antisense  | 2310046O06Rik |
| CUST_5232_PI419771968  | 4.519005 | 4.140282 | 6.608478 | 6.481758 | 0.035569 | -2.21547 | AK039574 | uc008xls | Intergenic | NA            |
| CUST_6461_PI419771968  | 7.123391 | 7.355662 | 9.500545 | 9.414621 | 0.017603 | -2.21806 | Dscaml1  | uc009pfx | Sense      | Dscaml1       |
| CUST_1018_PI419771968  | 3.696648 | 3.339806 | 5.595165 | 5.880152 | 0.012155 | -2.21943 | NA       | AK080710 | Sense      | BC048943      |
| CUST_9134_PI419771968  | 6.576732 | 6.388878 | 8.553643 | 8.861928 | 0.012732 | -2.22498 | NA       | AK020813 | Antisense  | Dst           |
| CUST_7592_PI419771968  | 7.028091 | 6.967996 | 9.200459 | 9.393479 | 0.016115 | -2.29893 | NA       | AK013743 | Sense      | Mapk10        |
| CUST_483_PI419771968   | 7.789964 | 7.900298 | 10.21305 | 10.09755 | 0.001207 | -2.31017 | NA       | AK019197 | Sense      | Mgst3         |
| CUST_2155_PI419771968  | 5.054427 | 5.52933  | 7.971774 | 7.34089  | 0.031757 | -2.36445 | C78409   | uc007hih | Sense      | Slc26a10      |
| CUST_7317_PI419771968  | 9.507999 | 10.08143 | 12.02237 | 12.30863 | 0.038757 | -2.37078 | NA       | AK009336 | Antisense  | 1600029D21Rik |
| CUST_4347_PI419771968  | 6.562963 | 6.963665 | 9.404385 | 8.904472 | 0.019838 | -2.39111 | AK132189 | uc008kvl | Antisense  | Pacsin3       |

|                        |          |          |          |          |          |          |           |          |            |               |
|------------------------|----------|----------|----------|----------|----------|----------|-----------|----------|------------|---------------|
| CUST_13250_PI419771968 | 6.952913 | 7.528724 | 9.957798 | 9.347658 | 0.029162 | -2.41191 | NA        | BC051480 | Intergenic | NA            |
| CUST_8796_PI419771968  | 7.11807  | 7.470032 | 9.49647  | 9.923341 | 0.014331 | -2.41585 | NA        | AK019637 | Antisense  | Mprip         |
| CUST_4996_PI419771968  | 6.025939 | 6.620228 | 9.012012 | 8.515258 | 0.026169 | -2.44055 | AK078255  | uc008uhp | Intergenic | NA            |
| CUST_3411_PI419771968  | 4.357683 | 3.845377 | 6.180313 | 6.912733 | 0.040371 | -2.44499 | AK139359  | uc007xwq | Intergenic | NA            |
| CUST_11760_PI419771968 | 5.658741 | 6.028724 | 8.384483 | 8.33491  | 0.04325  | -2.51596 | NA        | AK078252 | Sense      | Dlg2          |
| CUST_4662_PI419771968  | 9.185065 | 9.033201 | 11.64199 | 11.65814 | 0.017748 | -2.54093 | AK031097  | uc008pmi | Sense      | Ppm11         |
| CUST_778_PI419771968   | 12.14399 | 12.2581  | 14.62789 | 14.87378 | 0.011493 | -2.54979 | NA        | AK046581 | Sense      | Fitm2         |
| CUST_9083_PI419771968  | 8.254611 | 8.690213 | 10.81167 | 11.23496 | 0.013913 | -2.5509  | NA        | AK020603 | Intergenic | NA            |
| CUST_7036_PI419771968  | 7.743075 | 8.024158 | 10.74711 | 10.16284 | 0.036817 | -2.57136 | NA        | AK006445 | Intergenic | NA            |
| CUST_4538_PI419771968  | 6.961963 | 7.098986 | 9.576765 | 9.661385 | 0.002526 | -2.5886  | AK052878  | uc008obi | Antisense  | Sall4         |
| CUST_4084_PI419771968  | 10.31621 | 10.63803 | 13.4271  | 12.73752 | 0.046962 | -2.60519 | AK086006  | uc008hbv | Intergenic | NA            |
| CUST_6241_PI419771968  | 5.230838 | 5.753952 | 7.874513 | 8.336513 | 0.018114 | -2.61312 | AK134933  | uc009mlf | Intergenic | NA            |
| CUST_219_PI419771968   | 7.438768 | 6.913454 | 10.06582 | 9.568251 | 0.0184   | -2.64093 | NA        | AK009418 | Intergenic | NA            |
| CUST_13262_PI419771968 | 6.986783 | 6.344514 | 9.049444 | 9.565885 | 0.026221 | -2.64202 | NA        | BC054084 | Intergenic | NA            |
| CUST_9789_PI419771968  | 4.135911 | 4.540052 | 6.895091 | 7.0839   | 0.021679 | -2.65152 | NA        | AK034284 | Sense      | Creb5         |
| CUST_7264_PI419771968  | 4.315603 | 4.545172 | 6.985136 | 7.196355 | 0.003524 | -2.66036 | NA        | AK008598 | Antisense  | Pcdh1         |
| CUST_7303_PI419771968  | 5.555565 | 5.993912 | 8.758879 | 8.174359 | 0.021959 | -2.69188 | NA        | AK009088 | Intergenic | NA            |
| CUST_10397_PI419771968 | 5.497644 | 5.604847 | 8.022955 | 8.510908 | 0.04739  | -2.71569 | NA        | AK040435 | Intergenic | NA            |
| CUST_8579_PI419771968  | 4.73084  | 4.598056 | 7.286512 | 7.489952 | 0.00399  | -2.72378 | NA        | AK018012 | Sense      | Mapk14        |
| CUST_4384_PI419771968  | 5.90678  | 6.61284  | 8.811697 | 9.188653 | 0.039751 | -2.74037 | AK006310  | uc008lmt | Antisense  | Ccdc34        |
| CUST_4729_PI419771968  | 7.084018 | 7.653119 | 10.39956 | 9.840275 | 0.020402 | -2.75135 | AK052161  | uc008qne | Antisense  | Polr3gl       |
| CUST_6592_PI419771968  | 5.345624 | 6.231148 | 8.985021 | 8.108108 | 0.047445 | -2.75818 | AK134047  | uc009rgt | Antisense  | Bfsp2         |
| CUST_4156_PI419771968  | 4.475409 | 4.586558 | 7.351019 | 7.301858 | 0.003669 | -2.79546 | mKIAA1560 | uc008hxj | Sense      | Gpam          |
| CUST_11126_PI419771968 | 7.47933  | 7.808822 | 10.30632 | 10.57853 | 0.006606 | -2.79835 | NA        | AK048684 | Intergenic | NA            |
| CUST_9596_PI419771968  | 5.367318 | 5.856408 | 8.656822 | 8.175284 | 0.014659 | -2.80419 | NA        | AK032312 | Sense      | Kcnd2         |
| CUST_2292_PI419771968  | 7.332396 | 7.618729 | 10.35084 | 10.26464 | 0.02069  | -2.83218 | AK149240  | uc007jlo | Sense      | Pirt          |
| CUST_9798_PI419771968  | 5.164173 | 5.355424 | 8.006865 | 8.326737 | 0.009015 | -2.907   | NA        | AK034340 | Intergenic | NA            |
| CUST_12257_PI419771968 | 8.136285 | 8.600069 | 11.43608 | 11.15171 | 0.015735 | -2.92572 | NA        | AK084755 | Sense      | Kcnd2         |
| CUST_7918_PI419771968  | 4.207745 | 4.364059 | 6.928682 | 7.513747 | 0.048973 | -2.93531 | NA        | AK015455 | Intergenic | NA            |
| CUST_7283_PI419771968  | 4.73696  | 4.16933  | 7.647849 | 7.135782 | 0.016996 | -2.93867 | NA        | AK008868 | Antisense  | 1700011I03Rik |
| CUST_6172_PI419771968  | 8.244566 | 8.360525 | 11.31967 | 11.22533 | 0.000806 | -2.96995 | AK040224  | uc009lkz | Antisense  | Mfhas1        |

|                        |          |          |          |          |          |          |           |          |            |        |
|------------------------|----------|----------|----------|----------|----------|----------|-----------|----------|------------|--------|
| CUST_2494_PI419771968  | 6.539216 | 6.885022 | 9.550309 | 9.816805 | 0.00682  | -2.97144 | AK086245  | uc007mmy | Intergenic | NA     |
| CUST_8809_PI419771968  | 4.973059 | 4.991781 | 8.0364   | 7.992302 | 0.00103  | -3.03193 | NA        | AK019673 | Sense      | Magi1  |
| CUST_7328_PI419771968  | 3.649005 | 3.389962 | 6.230311 | 6.892866 | 0.042352 | -3.04211 | NA        | AK009506 | Antisense  | Camk4  |
| CUST_5749_PI419771968  | 5.423513 | 5.694732 | 8.600889 | 8.675331 | 0.018968 | -3.07899 | AK084599  | uc009erv | Antisense  | Sspn   |
| CUST_9198_PI419771968  | 5.65015  | 6.044548 | 8.577667 | 9.296727 | 0.03316  | -3.08985 | NA        | AK021025 | Intergenic | NA     |
| CUST_2870_PI419771968  | 4.173501 | 4.860521 | 7.879304 | 7.356664 | 0.022589 | -3.10097 | AK131952  | uc007rdj | Intergenic | NA     |
| CUST_7293_PI419771968  | 6.253864 | 6.906753 | 9.809153 | 9.574258 | 0.043233 | -3.1114  | NA        | AK008951 | Intergenic | NA     |
| CUST_1751_PI419771968  | 5.168959 | 4.933283 | 8.185163 | 8.163671 | 0.022905 | -3.1233  | AK085943  | uc007chu | Intergenic | NA     |
| CUST_6690_PI419771968  | 4.085262 | 3.921521 | 6.95175  | 7.48664  | 0.036729 | -3.2158  | mKIAA1575 | uc009sqv | Sense      | Bcor   |
| CUST_12616_PI419771968 | 7.816864 | 8.036139 | 11.19598 | 11.13847 | 0.014526 | -3.24073 | NA        | AK089956 | Intergenic | NA     |
| CUST_4022_PI419771968  | 4.283289 | 4.652611 | 7.70846  | 7.839124 | 0.020054 | -3.30584 | BC085508  | uc008gcx | Antisense  | Drap1  |
| CUST_2296_PI419771968  | 7.537372 | 7.842243 | 10.95791 | 11.06531 | 0.015782 | -3.3218  | Dhrs7c    | uc007jnb | Sense      | Dhrs7c |
| CUST_647_PI419771968   | 5.171337 | 5.275612 | 8.561766 | 8.766587 | 0.004796 | -3.4407  | NA        | AK036265 | Antisense  | Bdh1   |
| CUST_7342_PI419771968  | 5.522897 | 4.993771 | 8.596963 | 8.854873 | 0.020522 | -3.46758 | NA        | AK009705 | Intergenic | NA     |
| CUST_2098_PI419771968  | 5.442866 | 5.986299 | 9.06716  | 9.305318 | 0.02437  | -3.47166 | AK087886  | uc007gwe | Antisense  | Cradd  |
| CUST_5743_PI419771968  | 7.195631 | 8.101384 | 11.51341 | 10.75607 | 0.029535 | -3.48623 | AK039595  | uc009erd | Antisense  | Case1  |
| CUST_4456_PI419771968  | 4.010314 | 4.466153 | 8.206489 | 7.545438 | 0.017155 | -3.63773 | AK085768  | uc008mqp | Antisense  | Banf2  |
| CUST_53_PI419771968    | 11.12551 | 11.34905 | 15.00911 | 15.59551 | 0.025592 | -4.06503 | NA        | AK003803 | Sense      | Dgat2  |
| CUST_1089_PI419771968  | 7.556989 | 7.858784 | 11.7501  | 12.0308  | 0.002479 | -4.18256 | NA        | AK084656 | Intergenic | NA     |
| CUST_6072_PI419771968  | 10.00078 | 10.47062 | 14.51285 | 14.83331 | 0.00675  | -4.43738 | AK041267  | uc009kdm | Antisense  | Dhx32  |

**Table S6 Sequences of the full-length lncRNA-Safe.**

Red sequence represents newly amplified sequence by 5' RACE assay, blue sequence represents newly amplified sequence by 3' RACE assay.

**AGAGCCCAGCAAGTAACCCTTTAAGGTGACATCTAGTGA**CTCAGAGCACTCTTAGATTG  
**ATTACCTCAAGGCGGAAGGAGAAGGTGGAAGTACAGTGCCTCGCCTCTCTTTACCCTG**  
**AGCCAGTGGGAACTGGTGGGAACAGATAGGGAACAGCCTGGGAGAGAGGATGAAGAG**  
**AAGGAAGAAAGCCC**GGAGAGAAGGAGGAACGAGAAAGGGGCCATTTCCAGAAGGTC  
**CGGAGACCCTGCCTCCGTCCGGGGCCGGCTTACATCCCTGTGGGCGGAGTCTTGGAGA**  
**ACAGACCGCGTCTCGCGCTTGC**GGGGCCACATCCTCAGGACTCGTGCGGGGTCCCTGGCT  
CTACCCCGCGGGTACCTGCTCGAGCTGCGGGGCTACCTCCAGCACGGCCGCCGCTTTGAGC  
TCCGCCATGATCGTCGCCGCGTCGGATCCCCGCCGGGAGAGTGTAGCAGAGTCCGCGTTGGA  
GCCGAGCTGACAGTGGCCGGGCGGGTGGCCTGGCTGTGGCTGCAGTGGTACCTCCTCCGGAG  
CCCAGGTCACCATGCACTGCGCACCTCCCTAGCGTAGTGAGGGACTCCTCAGTGTGGCATGG  
GCACGTTCTGCGGGTCCCTCCTACATGATGAAAGGTCCTGCGTCCCACCACGCCCTGTACTCTC  
TGCTGGAACCAGAGGTGACTGGGCTGGAGGAGGGTCCGGAACAGAACTTAAGTATGGAAGG  
ACTTACCACATTCACAATGGCTGCTCTTCTCTAAGAATCTCCAGCAATACACAGCAGGACTGT  
GAGGCACAGTTCAGAGTCCCATTGATATGTAAGTGAATTGCTGAGATGGACCAATGAGAGCCT  
TCGAAGTCTCTGCTGTCTGCAGGAGCAGTGGCCACGAATCTGGCTGAAATGTGGGGTACATG  
CTAATGTATGGGGAGACCAGTCTTAAACCACTGGAGTAGCTGGTAACTTCAACCTGCTGTGGG  
GAGGACTGGGCCTCCTGAGAAGGAAATGACAGAGCTCCCTCCAAGGTCGTTGGTCAAAGGA  
GACATGACAGAAGACAAAGAATAGGTACAACAAGATGTAAAGTTTATATACAAAGAATATAAT  
GTTTATCTGAAATATTTACAGTGTCCGGTTAAAGCAATATTTTTACAACCTTTTCCAGGTCAACTAC  
TACGTATATTAC**AGGTAAGCTACAATGATTTAGTTTG**CAAAAAAATGATTA  
**AAAAAATTGAA**  
**TAAAAGATGTTTTAAACA**AGCTTAAATACTCGTCAATTTATAGACTGTATTCACTTTT  
**TATTTG**AGGGCATCATGCAATGAGGAATGGTACTGTGTGCTTATAAACTGAAGTTCTGTAGC  
TGGGATGGGAACGCATGCAATGGTCAGAGCTCATGAGGGCATAAAACGAGCAACGAAATGTT  
TGAAGACTTAGATGCCGATTCTCAGGCTGGAAGTGAAGAACTTTGAGATAACAGCCAGCT  
TTATCTCAACTAAGTCTGGGACCCACAAGCTTAGACCACAGAGGG

**Table S7 List of predicted open reading frame in *Safe* sequence.**

| Label  | Strand | Frame | Start | Stop  | RNA length (nt) | Protein length (aa) |
|--------|--------|-------|-------|-------|-----------------|---------------------|
| ORF-1  | +      | 3     | 168   | 410   | 243             | 80                  |
| ORF-2  | +      | 1     | 595   | 756   | 162             | 53                  |
| ORF-3  | +      | 2     | 1406  | >1516 | 111             | 36                  |
| ORF-4  | +      | 3     | 1353  | 1421  | 69              | 22                  |
| ORF-5  | +      | 2     | 419   | 484   | 66              | 21                  |
| ORF-6  | +      | 3     | 999   | 1058  | 60              | 19                  |
| ORF-7  | +      | 2     | 839   | 895   | 57              | 18                  |
| ORF-8  | +      | 3     | 1422  | 1463  | 42              | 13                  |
| ORF-9  | +      | 2     | 908   | 949   | 42              | 13                  |
| ORF-10 | +      | 3     | 918   | 956   | 39              | 12                  |
| ORF-11 | +      | 3     | 1305  | 1337  | 33              | 10                  |
| ORF-12 | -      | 2     | 322   | 41    | 282             | 93                  |
| ORF-13 | -      | 3     | 549   | 352   | 198             | 65                  |
| ORF-14 | -      | 3     | 219   | 61    | 159             | 52                  |
| ORF-15 | -      | 3     | 909   | 796   | 114             | 37                  |
| ORF-16 | -      | 1     | 1382  | 1278  | 105             | 34                  |
| ORF-17 | -      | 2     | 1039  | 959   | 81              | 26                  |
